# Supplementary material for: Reduced Incidence of Prevotella and Other Fermenters in Intestinal Microflora of Autistic Children
Source: PLoS One. 2013 Jul 3;8(7):e68322. doi: 10.1371/journal.pone.0068322 (PMC3700858; doi:10.1371/journal.pone.0068322)
Supplement: Dataset S1 — Detailed information of metadata on the survey of neurotypical and autistic participants. Metadata include GI severity, autistic severity indices, diet survey, and relative abundances of gut microbiota at the genus level. (XLSX) [file pone.0068322.s017.xlsx]

## Sheet: Metadatabase & Gut microbiota
Dataset S1. Detailed information of metadata on the survey of neurotypical and autistic participants. Metadata include GI severity, autistic severity indices, diet survey, and relative abundances of gut microbiota at the genus level. 'NA' stands for 'Not available' data.
ID	N01	N02	N03	N04	N05	N06	N07	N08	N09	N10	N11	N12	N13	N14	N15	N16	N17	N18	N19	N20	A01	A02	A03	A04	A05	A06	A07	A08	A09	A10	A11	A12	A13	A14	A15	A16	A17	A18	A19	Excluded
Group	N	N	N	N	N	N	N	N	N	N	N	N	N	N	N	N	N	N	N	N	A-GI-	A-GI-	A-GI-	A-GI-	A-GI-	A-GI-	A-GI-	A-GI-	A-GI-	A-GI-	A-GI-	A-GI+	A-GI+	A-GI+	A-GI+	A-GI+	A-GI+	A-GI+	A-GI+	A-GI-
Age	12	13	5	12	4	4	8	13	6	4	5	6	3	14	4	4	15	8	16	10	6	5	8	11	11	9	6	6	4	4	5	4	5	4	3	7	11	9	9	15
gender	M	M	M	M	M	M	M	M	M	M	M	M	M	F	F	F	M	M	M	M	M	M	M	M	M	M	M	M	M	F	M	M	F	M	M	M	M	M	M	M
constipation (GS1)	0	0	0	0	0	0	0	0	0	0	0	0	0	1	1	1	1	0	0	0	0	0	0	1	1	0	1	1	0	2	0	1	2	1	2	2	1	1	2	1
diarrhea (GS2)	0	0	0	0	0	0	0	0	0	0	0	0	0	0	0	0	0	0	0	0	0	0	0	0	0	0	0	0	0	0	0	0	0	0	1	0	0	1	1	0
consistency (GS3)	0	0	0	0	0	0	0	0	0	0	0	0	0	0	0	0	0	0	1	0	0	0	1	0	0	1	0	1	2	1	1	0	1	1	1	0	0	1	1	0
smell (GS4)	0	0	0	0	0	0	0	0	0	0	0	0	0	0	0	0	0	0	1	0	1	0	0	0	0	1	0	1	0	2	1	2	1	2	1	2	2	2	1	0
flatulence (GS5)	0	0	0	0	0	0	0	0	0	0	0	0	0	0	0	0	0	1	0	2	0	1	0	1	1	1	2	0	2	0	2	2	1	1	1	1	2	2	2	1
abdominal pain (GS6)	0	0	0	0	0	0	0	0	0	0	0	0	0	0	0	0	0	0	0	1	0	1	1	0	0	0	0	1	0	0	1	1	1	1	1	2	2	1	1	1
GS Index total	0	0	0	0	0	0	0	0	0	0	0	0	0	1	1	1	1	1	2	3	1	2	2	2	2	3	3	4	5	5	5	6	6	6	7	7	7	8	8	3
ADOS Module	NA	NA	NA	NA	NA	NA	NA	NA	NA	NA	NA	NA	NA	NA	NA	NA	NA	NA	NA	NA	2	2	1	3	3	3	3	3	2	1	2	4	1	1	1	3	3	3	2	1
Communication Sub	NA	NA	NA	NA	NA	NA	NA	NA	NA	NA	NA	NA	NA	NA	NA	NA	NA	NA	NA	NA	7	2	6	2	1	4	2	3	6	6	5	4	3	4	6	5	4	7	5	5
Social sub	NA	NA	NA	NA	NA	NA	NA	NA	NA	NA	NA	NA	NA	NA	NA	NA	NA	NA	NA	NA	8	6	13	7	6	10	7	5	6	8	11	8	4	9	13	8	11	11	8	5
Play/imagination creativity total	NA	NA	NA	NA	NA	NA	NA	NA	NA	NA	NA	NA	NA	NA	NA	NA	NA	NA	NA	NA	0	0	4	1	0	1	2	0	1	4	1	1	1	2	4	1	2	2	1	10
Stereo behav/restric Interests	NA	NA	NA	NA	NA	NA	NA	NA	NA	NA	NA	NA	NA	NA	NA	NA	NA	NA	NA	NA	2	0	6	2	1	4	2	2	1	4	2	2	3	2	5	1	0	1	2	3
ADOS total (Comm + Social)	NA	NA	NA	NA	NA	NA	NA	NA	NA	NA	NA	NA	NA	NA	NA	NA	NA	NA	NA	NA	15	8	19	9	7	14	9	8	12	14	16	12	7	13	19	13	15	18	13	5
speech/lang/comunication (ATEC1)	NA	NA	NA	NA	NA	NA	NA	NA	NA	NA	NA	NA	NA	NA	NA	NA	NA	NA	NA	NA	6	4	24	8	9	0	3	0	15	16	14	NA	13	13	23	3	11	12	16	19
sociability (ATEC2)	NA	NA	NA	NA	NA	NA	NA	NA	NA	NA	NA	NA	NA	NA	NA	NA	NA	NA	NA	NA	15	6	21	16	19	18	14	16	28	17	19	NA	16	15	14	12	32	19	20	14
sensory/cognition (ATEC3)	NA	NA	NA	NA	NA	NA	NA	NA	NA	NA	NA	NA	NA	NA	NA	NA	NA	NA	NA	NA	10	11	23	18	15	13	12	12	27	15	25	NA	13	19	11	9	20	16	13	20
health/physical (ATEC4)	NA	NA	NA	NA	NA	NA	NA	NA	NA	NA	NA	NA	NA	NA	NA	NA	NA	NA	NA	NA	17	17	38	11	28	29	29	24	31	37	52	NA	12	39	38	13	35	36	12	23
ATEC Total	NA	NA	NA	NA	NA	NA	NA	NA	NA	NA	NA	NA	NA	NA	NA	NA	NA	NA	NA	NA	48	38	106	53	71	60	58	52	101	85	110	NA	54	86	86	37	98	83	61	76
Sensory total (+) (PDDBI1)	NA	NA	NA	NA	NA	NA	NA	NA	NA	NA	NA	NA	NA	NA	NA	NA	NA	NA	NA	NA	14	8	18	23	2	20	8	21	NA	40	30	NA	6	37	45	18	39	25	10	21
Ritual total (+) (PDDBI2)	NA	NA	NA	NA	NA	NA	NA	NA	NA	NA	NA	NA	NA	NA	NA	NA	NA	NA	NA	NA	27	21	16	17	13	31	17	28	NA	8	24	NA	17	16	19	11	35	23	5	21
SOCPP total (+) (PDDBI3)	NA	NA	NA	NA	NA	NA	NA	NA	NA	NA	NA	NA	NA	NA	NA	NA	NA	NA	NA	NA	17	10	21	20	18	18	12	22	NA	15	27	NA	10	27	7	22	34	16	9	8
SOCAPP (-) (PDDBI4)	NA	NA	NA	NA	NA	NA	NA	NA	NA	NA	NA	NA	NA	NA	NA	NA	NA	NA	NA	NA	78	85	28	57	71	62	74	67	NA	54	57	NA	57	56	34	89	59	75	72	56
Express (-) (PDDBI5)	NA	NA	NA	NA	NA	NA	NA	NA	NA	NA	NA	NA	NA	NA	NA	NA	NA	NA	NA	NA	17	51	0	56	83	85	90	62	NA	42	41	NA	16	45	10	86	35	54	46	16
PDDBI total	NA	NA	NA	NA	NA	NA	NA	NA	NA	NA	NA	NA	NA	NA	NA	NA	NA	NA	NA	NA	-37	-97	27	-53	-121	-78	-127	-58	NA	-33	-17	NA	-40	-21	27	-124	14	-65	-94	-22
Genera	(Unit: % of a whole bacteria)
ID	N01	N02	N03	N04	N05	N06	N07	N08	N09	N10	N11	N12	N13	N14	N15	N16	N17	N18	N19	N20	A01	A02	A03	A04	A05	A06	A07	A08	A09	A10	A11	A12	A13	A14	A15	A16	A17	A18	A19	Excluded
Actinomycetaceae.Actinomyces	0	0.0232	0.0082	0.0451	0.111	0.0257	0.0082	0	0.0295	0	0.0564	0.0075	0.0032	0.069	0	0.0032	0.0194	0.0013	0.0263	0.0175	0.1599	0.0382	0.0251	0	0	0	0	0	0.0182	0.015	0.0445	0.0188	0	0.005	0.005	0	0.0144	0.0326	0.0514	NA
Actinomycetaceae.Varibaculum	0	0	0.0013	0	0	0	0.0106	0	0	0	0	0.3573	0.0151	0.0038	0	0	0	0	0	0	0	0.0075	0	0	0.0226	0	0	0	0	0.0288	0	0	0	0	0	0	0	0	0	NA
Aerococcaceae.Abiotrophia	0	0	0	0	0	0	0	0	0	0	0	0	0	0	0	0	0	0	0	0	0	0.0044	0	0	0	0	0	0	0.005	0	0	0	0	0	0	0	0.0032	0.0163	0	NA
Alcaligenaceae.Parasutterella	0.0163	0.0119	0	0.1392	0.1028	0.4802	0	0	0.0044	0	0.1937	0	0	0.0213	0	0.0784	0.1273	0	0.005	0.0106	14.216	0	0.0125	1.0595	0.0288	0.2846	0.7291	0	0	0	0	0.0238	3.9784	1.2313	0.015	0.01	0.0044	0.3216	1.0645	NA
Alcaligenaceae.Sutterella	0.3762	0.8959	0	0	0	0	13.0951	0.1084	0.1618	0.0376	0	0.1047	0.0871	0.1499	2.4149	0.0032	0	0	0.027	0.2426	0	0.0113	0.0439	0	0	0	0	0.4282	0	0.0307	0	0	0	0	0	0	0	0	0	NA
Alcaligenaceae.unknown_genus	0.0057	0.0025	0	0	0	0	0	0	0	0	0	0	0.0019	0	0.0094	0	0	0	0.0038	0.0057	0	0	0.0063	0	0	0	0	0	0	0.0119	0	0	0	0	0	0	0	0	0	NA
Bacillaceae.Bacillus	0	0.0044	0	0	0.0288	0	0	0	0	0	0.0903	0	0	0	0	0	0	0	0	0	0	0	0	0	0	0	0	0	0	0.0257	0	0	0	0	0	0	0	0	0	NA
Bacteroidaceae.Bacteroides	15.9883	22.2412	10.2345	11.4018	2.892	9.2853	3.5885	32.9189	4.9809	3.8311	6.7595	27.3419	36.0053	8.3336	19.9047	29.3279	9.6226	2.45	2.2061	2.5691	1.793	13.8361	21.9798	21.8444	5.0981	17.9826	32.6437	55.0724	10.852	0.8689	7.3625	3.4286	62.2469	16.5576	32.7829	10.7442	1.6337	14.3119	10.2357	NA
Bifidobacteriaceae.Bifidobacterium	0.5448	5.9977	1.0482	6.3219	0.1367	1.8607	6.5939	1.8964	3.107	3.7759	38.1876	3.5114	11.1974	23.0481	0.0458	0.1912	0.1981	0.6583	27.4723	5.2097	21.2244	6.8704	5.0091	0.6677	1.8914	0.8056	4.517	5.9444	0	71.0971	10.0784	0.1323	0.0163	7.2892	1.0263	2.5948	0.0025	20.4602	0	NA
Bifidobacteriaceae.unknown_genus	0.0038	0.015	0.0088	0.0238	0	0.005	0.0113	0	0.0025	0.0452	0.0163	0	0.0307	0.0276	0.0038	0	0	0	0.0483	0.0125	0.0163	0.094	0.0063	0.0125	0.01	0	0.0345	0	0	0.0332	0.126	0	0	0.037	0.0075	0.0232	0	0.0188	0.0088	NA
Campylobacteraceae.Campylobacter	0	0	0	0	0	0	0	0.005	0	0	0.0032	0	0	0.0307	0	0	0	0	0	0	0	0	0	0	0	0	0	0	0	0	0	0.0038	0	0	0	0	0	0	0	NA
Carnobacteriaceae.Granulicatella	0	0.0075	0	0.0125	0.01	0.0132	0.0094	0	0.0113	0.0063	0.0238	0	0.0088	0	0.0019	0.0132	0.0113	0	0.0119	0.0075	0.1492	0.0182	0	0	0	0.0038	0	0.0057	0.0219	0.01	0	0	0	0	0.005	0.0119	0.0063	0	0.0414	NA
Caulobacteraceae.Brevundimonas	0	0	0	0	0.0044	0	0	0	0	0	0	0	0	0	0	0.005	0	0	0	0	0	0	0	0	0	0	0	0	0.0038	0	0	0	0	0	0	0	0	0.0044	0	NA
Chloroplast.Streptophyta	0	0	0	0	0.0483	0.2733	0.0082	0.0301	0	0	0.0815	0.0106	0.0119	0	0	0.3454	0	0	0.0163	0.027	0.0038	0.1342	0.0063	0	0.0859	0.0044	0.0044	0.0057	0.0251	0.0307	0.0288	0.0163	0	0	0.8012	0.0294	0	0	0.0238	NA
Clostridiaceae.Clostridium	0.0081	0	0.005	0.0132	0.2903	0.0915	0.0044	0	0.1379	0.1361	0.1392	0.0796	0	0.0088	0.0201	0.01	0.7536	0.0288	0.0671	0.015	0.7485	0.2953	0	0	0.0125	0.1812	0.0032	0.0063	0	0.136	0.1367	0.2407	0	0.0125	0.0238	0.005	0.1442	0.0044	0.0207	NA
Clostridiaceae.Sarcina	0	0	0	0	0	0	0	0	0	0	0	0	0	0	0	0	0.1354	0	0	0	0	0.01	0	0	0	0	0	0	0	0.0821	0	0	0	0	0	0	0	0	0	NA
Clostridiaceae.unknown_genus	0	0	0.0038	0	0.0301	0.0163	0	0	0.0094	0.0144	0.0207	0.0232	0	0	0.0057	0.005	0.788	0.0038	0	0	0.0577	0.074	0	0	0.0025	0.0201	0	0.0044	0.0069	0.0232	0.0176	0.1066	0	0	0.005	0.0025	0.0088	0	0	NA
Comamonadaceae.Acidovorax	0	0	0	0	0.0119	0	0.0057	0	0	0	0.0188	0.0038	0	0	0	0	0.0044	0	0	0	0	0.005	0	0	0	0	0.005	0	0	0	0	0	0	0	0.0038	0	0.0025	0.0025	0	NA
Comamonadaceae.Delftia	0	0	0	0	0	0	0	0.1304	0	0	0.0088	0.0044	0	0	0	0	0	0	0	0.005	0	0	0	0	0	0	0.0188	0	0	0	0	0	0	0	0	0	0.0088	0	0	NA
Comamonadaceae.Hydrogenophaga	0	0	0	0	0	0	0	0	0	0	0	0	0	0	0	0	0	0.0157	0	0	0	0.0069	0	0	0.0075	0	0	0	0	0	0	0	0	0	0	0	0	0	0	NA
Comamonadaceae.unknown_genus	0	0	0	0	0	0	0	0	0	0	0.0044	0	0	0	0	0	0	0	0	0	0	0.005	0	0	0	0	0	0	0	0	0	0	0	0	0	0.0025	0	0	0	NA
Coriobacteriaceae.Asaccharobacter	0.005	0.0232	0	0.0633	0.1831	0.0276	0.0552	0	0.0063	0.005	0.1179	0	0	0	0.0069	0.089	0.0639	0	0.0138	0.1755	0.0602	0	0.0251	0.0125	0.0294	0.0044	0.0464	0	0.0295	0.0984	0.0207	0.0671	0	0	0	0.0226	0.4577	0	0	NA
Coriobacteriaceae.Atopobium	0	0.0082	0	0	0.0269	0	0	0	0.0032	0	0.0414	0	0	0	0	0	0.0032	0	0.0169	0.0088	0.01	0.0044	0	0	0	0	0	0	0	0	0	0	0	0	0	0	0.0044	0	0.0057	NA
Coriobacteriaceae.Collinsella	0.0194	1.4783	0.4984	0.9027	2.6368	0.2314	0.1041	0.4996	2.924	0.1849	3.9139	0	0	0.7015	0.0163	0.7529	0.7473	0	17.8459	1.9974	0.8206	0	0	0.1962	0.0194	0.9354	0.2602	0	0	0.111	1.1046	2.1014	0.015	0.7304	0	0.9235	4.1032	0	0.1197	NA
Coriobacteriaceae.Eggerthella	0.0057	0	0.0483	0.0182	0.1912	0.0608	0.0376	0.0357	0	0.0044	0.183	0.0232	0.0633	0.0113	0.0044	0.0082	0.0138	0.0088	0	0.015	0.0175	0.3085	0.0188	0	0.0207	0.0188	0.0106	0.005	1.0645	0.0288	0.4959	0.0345	0	0.2426	0.4971	0.183	0.2828	0.1348	0.0489	NA
Coriobacteriaceae.Gordonibacter	0	0.0169	0.0357	0.0928	0.4984	0.0633	0.0401	0	0	0	0.0345	0.0201	0.015	0.0301	0	0.0332	0.0295	0.0232	0.0445	0.4595	0	0.0144	0.0376	0.0063	0.0144	0.1053	0.005	0.0175	0.1041	0.2219	0.0057	0.0282	0.0063	0.0414	0	0.1561	0.378	0.0119	0.0263	NA
Coriobacteriaceae.Olsenella	0	0	0	0	0	0	0	0.0232	0.0213	0.01	0.0038	0	0	0	0	0	0	0	0	0	0	0	0	0	0	0	0	0	0	0	0	0	0	0	0	0	0	0	0	NA
Coriobacteriaceae.Paraeggerthella	0	0	0	0	0	0	0	0.0057	0.0057	0.0057	0	0	0	0	0	0	0	0	0	0	0	0	0	0	0	0	0	0	0	0	0	0	0	0.0094	0	0	0	0	0	NA
Coriobacteriaceae.Slackia	0	0	0	0	0	0	0	0.0125	0.0282	0.0238	0	0	0	0	0	0	0	0	0.8232	0	0	0	0	0	0.0113	0	0.0125	0	0	0.205	0	0	0.0057	0	0	0	3.6123	0	0	NA
Coriobacteriaceae.unknown_genus	0.0075	0.0207	0.0313	0.2683	0.5667	0.153	0.0871	0.2019	0.257	0.2878	0.0539	0	0	0.0445	0.005	0.0558	0.1172	0	0.1918	1.0294	0.0683	0.0119	0.0063	0.0063	0.0169	0.0351	0.0326	0.0113	0.1059	0.0132	0.0132	0.089	0	0.1166	0.0119	0.0458	0.1197	0.0119	0.0163	NA
Corynebacteriaceae.Corynebacterium	0	0	0	0.0169	0	0	0	0.0057	0	0	0.0176	0	0	0.6438	0	0	0	0.0032	0.0038	0.0032	0	0.0144	0	0	0	0	0.0063	0	0.0038	0	0	0	0	0	0	0.0044	0	0	0	NA
Desulfovibrionaceae.Desulfocurvus	0.009	0	0	0	0	0.0035	0	0	0	0	0	0	0	0.0042	0	0	0	0	0	0	0	0	0	0	0	0	0	0	0	0	0	0	0	0	0	0	0	0	0	NA
Desulfovibrionaceae.Desulfovibrio	1.2808	0	0.0032	0	0	0	0.0784	1.0664	0.0921	0.084	0	0	0	0.7228	0.7749	0	0.5122	0	0	0.0075	0.0094	0	0	0.0872	0	0	0.1818	0	0	0.0038	0	0	0	0	0	0	0	0	0	NA
Desulfovibrionaceae.Lawsonia	0.0057	0	0	0.0106	0	0.005	0	0	0	0	0	0	0	0	0	0	0.0094	0	0	0.0138	0	0	0	0	0	0	0	0	0	0.0032	0	0	0	0.0094	0	0.0044	0	0	0	NA
Desulfovibrionaceae.unknown_genus	0.1078	0.0451	0.005	0.0032	0.0144	0.0182	0.0251	0.0226	0.0138	0.005	0.0106	0.047	0.0175	0.0226	0.0069	0.0088	0	0.0013	0	0.2081	0	0	0.0188	0.0921	0.0107	0.005	0.0113	0	0	0.0163	0	0.0038	0	0.1091	0	0.0207	0	0.0113	0.0025	NA
Enterobacteriaceae.Citrobacter	0	0.089	3.4857	0.0934	0.1185	0.9655	0	0	0	0	0.0182	2.0532	0.6338	0	0.015	0.0063	0	0.1868	0.0345	0.01	0.0357	0.0219	0	0	0.1812	0	0.01	0	0	0.0188	0.0057	0.0182	0	0	3.9383	0.0351	0	0.6802	0	NA
Enterobacteriaceae.Dickeya	0	0	0.4834	0	0	0.0213	0	0	0.0032	0	0	0.0038	0	0	0	0	0	0.0088	0	0	0	0	0	0	0	0	0	0	0	0	0	0	0	0	0	0.0044	0	0.01	0	NA
Enterobacteriaceae.Enterobacter	0	0.4006	0.6156	0	0.0125	0.0859	0	0.005	0.005	0	0.0502	0.9711	0.1918	0	0	0.0207	0.064	7.6002	0.0539	0.0113	0.1285	0.027	0	0	0.0125	0.084	0.1022	0.0057	0	0	1.3103	0	0.0057	0.0044	0.5573	0.015	0	0.1925	0	NA
Enterobacteriaceae.Escherichia/Shigella	0.0125	0.8526	2.4525	0	1.4977	8.0785	0.0094	0.0113	0.0602	0	0.0401	6.1062	9.2282	0	0	0.0483	0.1542	3.1083	0.0521	0	0.1473	0.0119	0.0063	0	0.0201	0.0646	0.1329	0.0063	0	0	0.0263	0.0113	0.01	0.0044	0.1969	0.9836	0.0294	10.5486	0	NA
Enterobacteriaceae.Klebsiella	0	0	0.0044	0.0138	0	0	0	0	0	0	0	0	0	0	0	0.0044	0	0	0	0	0	0.21	0	0	0	0	0.0144	0	0	0.0032	0.1912	0	0	0.0044	0.0119	0.0032	0	0	0	NA
Enterobacteriaceae.Pectobacterium	0	0	0.0031	0	0	0	0	0	0	0	0	0	0	0	0	0	0	0	0	0	0	0	0	0	0	0	0.0044	0	0	0	0	0	0	0	0	0	0	0.005	0	NA
Enterobacteriaceae.Providencia	0	0	0	0.0038	0	0	0	0	0	0	0.0019	0	0.1285	0	0	0	0	0	0.1411	0	0	0	0	0	0	0	0	0	0	0	0	0	0	0	0	0	0	0	0	NA
Enterobacteriaceae.Raoultella	0.0032	0	0	0	0	0	0	0	0	0	0	0	0	0	0.0257	0.0508	0.0132	0	0	0	0.0032	0.0332	0	0	0	0	0	0	0	0	0.0044	0	0	0	0	0	0	0	0	NA
Enterobacteriaceae.Salmonella	0	0.0044	0.0038	0	0	0	0	0	0	0	0	0	0	0	0	0	0	0.0188	0	0	0.0038	0	0	0	0	0	0	0	0	0	0	0	0	0	0	0.0038	0	0	0	NA
Enterobacteriaceae.unknown_genus	0.1078	22.1466	71.1397	0.2928	5.3915	21.3109	0.0953	0.1856	0.4025	0.0213	1.2795	34.764	24.9307	0.0119	0.2345	2.8656	3.5678	78.9493	0.8087	0.0251	5.5451	1.5454	0.0188	0.3486	1.3592	1.1128	1.3372	0.0978	0	0.0219	2.366	0.0752	0.0646	0.2288	9.4433	18.5813	0.2364	25.0655	0.0138	NA
Enterococcaceae.Enterococcus	0	0.0038	0.0019	0	0	0.0044	0	0	0	0.0044	0.0207	0.0727	0.1467	0.0038	0	0	0	0.2551	0.2157	0.0013	0	1.1999	0.0627	0	0.0038	0.3172	0.0044	0	0	0.0144	0.0514	0.0038	0	0.0063	0.2671	0.0752	0.1787	0	0	NA
Erysipelotrichaceae.Allobaculum	0	0	0	0	0	0	0	0	0	0	0	0.0069	0	0	0	0	0.0081	0.0032	0	0	0	0	0	0	0	0	0	0	0	0	0	0	0	0	0	0.0032	0	0.0107	0	NA
Erysipelotrichaceae.Coprobacillus	0.0627	0.2777	0.7912	0.6608	1.1027	0.5579	0.1022	0.0577	0.0558	0.1386	0.9416	0.4094	0.4627	0.4432	0.0169	0.4019	0.9028	0.0044	0.5441	1.3053	1.5679	0.0702	0.3323	0.2646	0.1592	1.4187	0.1179	0.1925	5.2599	0.2113	0.2733	0.242	0.0063	0.1912	0.4276	0.4376	0.8031	0.1937	0.0044	NA
Erysipelotrichaceae.Holdemania	0.0207	0.0408	0.0633	0.4608	0.3059	0.5066	0.1937	0.0063	0.0439	0.0464	1.1943	0.0251	0	0.0533	0.0169	0.0708	0.1505	0.0884	0.1141	0.1768	0.0846	0.0219	0.3197	0.0621	0.0238	0.5573	0.0351	0.1398	0.3128	0.0057	0	0.5109	0.0859	0.1831	0	0.2138	0.1636	0.5341	0.0013	NA
Erysipelotrichaceae.Solobacterium	0	0	0	0.0489	0.01	0	0	0	0.0477	0	0.1085	0	0	0	0	0	0.0132	0	0	0.0088	0.0464	0.0013	0	0	0.1793	0	0	0	0	0.0207	0	0	0	0	0.005	0	0	0.0019	0.0075	NA
Erysipelotrichaceae.Turicibacter	0	0.0201	0.0163	0.1473	0.3993	0.1799	0.0138	0	0.1674	0	0.0057	0.0038	0.0075	0	0.0006	0.1279	0.0426	0	0.0044	0.0326	0.3761	0	0.0502	0	0.0113	0.0571	0	0	0.0201	0.0665	0.0057	0.1568	0.0288	0	0	0.0332	0.0056	0	0.0909	NA
Erysipelotrichaceae.unknown_genus	0.005	0.1969	0.084	0.0451	0.0828	0.0646	0.099	0.0119	0.0376	0	0.1247	0.0408	0.037	0	0.0125	0.0777	0.5153	0.1047	0.0163	0.0759	0.1593	0.0282	0.3573	0.0119	0.1091	0.0307	0	0.0452	0.136	0.0032	0.0345	0.0075	0.01	0.0539	0.0163	0.0232	0.0157	0.2671	0	NA
Eubacteriaceae.Acetobacterium	0	0	0.0238	0	0	0	0	0	0	0	0	0	0.0063	0	0	0	0	0	0	0	0	0	0	0	0	0	0.0044	0	0	0.0163	0	0	0	0.1705	0	0	0	0	0	NA
Eubacteriaceae.Anaerofustis	0	0.0063	0	0	0.0207	0	0.01	0	0	0	0.0715	0	0.0075	0.0144	0	0	0.01	0	0.0633	0.0069	0	0	0	0	0	0	0	0	0	0.0107	0.0038	0.0032	0	0.0295	0	0.005	0.0138	0	0	NA
Eubacteriaceae.Eubacterium	0.0282	0.0934	0.0282	0.1028	0.0125	0.3266	0.0364	0.0057	0.01	0.0044	0.0909	0.0313	0.2238	0.0282	0.0571	0.2997	0.0351	0.0006	0.4138	0.0251	0.1736	0.0383	0.3135	0.0677	0.0702	0.131	0.1367	0.3492	0.1392	0.0307	0.1204	0.0307	0.1793	0.6789	1.2752	0.0282	0.0032	0.3586	0.084	NA
Eubacteriaceae.unknown_genus	0	0.0069	0.0351	0.0194	0.0558	0.074	0.015	0	0	0	0	0.0082	0.21	0	0	0.0915	0.005	0	0	0	0	0	0	0	0	0	0.0671	0.0182	0	0.1235	0	0	0	0.2175	0	0.0721	0	0.0032	0.0201	NA
Fusobacteriaceae.Fusobacterium	0	0	0.0025	0	0.0075	0	0	0.0057	0.0063	0	0	0	0	0	0	0.0032	0	0	0	0	0	0	0	0	0.074	0	0	0.0113	0	0	0	0	0	0	0	0	0	0	0	NA
Incertae_Sedis_XI.Anaerococcus	0	0	0.0032	0.0044	0.0106	0	0	0.0276	0	0.005	0.0019	0.074	0.0094	0.0602	0	0.0075	0.0132	0	0	0	0	0.0508	0.0063	0	0.0163	0	0	0	0.0038	0.0257	0	0.089	0	0	0	0	0.1799	0	0	NA
Incertae_Sedis_XI.Finegoldia	0	0.005	0	0.0032	0.0057	0	0.0094	0	0	0.0057	0.0495	0.0038	0	0.0207	0	0	0	0.0025	0.0032	0.0057	0	0.0125	0.0063	0	0.0288	0	0	0	0.0038	0.0176	0	0.0075	0	0	0	0	0.3429	0	0	NA
Incertae_Sedis_XI.Parvimonas	0	0.0038	0	0.0188	0.0658	0.0846	0	0.0057	0.1806	0	0	0	0.0044	0	0	0.0057	0.0301	0	0.0025	0	0	0	0	0	0.0032	0.089	0	0.0226	0	0	0	0	0	0	0	0	0	0	0	NA
Incertae_Sedis_XI.Peptoniphilus	0	0	0.0019	0.0784	0.0326	0.0577	0	0.1229	0	0	0	0.8138	0.042	0.0213	0	0.0138	0.0338	0.0238	0	0.0032	0	0.0602	0.0125	0.0063	0.1091	0.0226	0.0082	0	0.0025	0.0684	0.005	0.0339	0.0057	0	0	0	4.4574	0.0038	0.0138	NA
Incertae_Sedis_XI.unknown_genus	0.0057	0	0.0244	0.2044	0.0878	0.3053	0.0188	0.3323	0.022	0	0.084	2.6487	0.153	0.0081	0	0.0476	0.0859	0.0125	0	0.015	0.0094	0.2244	0.0251	0	0.2746	0.1191	0	0	0	0.1059	0	0.0608	0	0	0	0	0.2501	0	0.0834	NA
Incertae_Sedis_XII.Fusibacter	0	0.0238	0.0013	0.0144	0	0	0.0044	0	0.0226	0.0125	0	0.0194	0	0	0	0	0.0301	0	0.005	0.0213	0	0	0	0	0.0044	0	0	0	0	0	0	0	0	0.0226	0	0	0	0	0	NA
Incertae_Sedis_XII.unknown_genus	0	0.0082	0	0.0106	0	0	0	0	0	0.0038	0	0	0	0	0	0	0.0044	0	0	0.0032	0	0	0	0	0	0	0	0	0	0	0	0	0	0.005	0	0	0	0	0	NA
Incertae_Sedis_XIII.Anaerovorax	0.0157	0.0796	0.0997	0.311	0.3548	0.647	0.1204	0.0633	0.0539	0.0163	0.037	0.032	0.0113	0.0238	0	0.089	0.311	0	0.8156	0.395	0.2715	0.1574	0.1191	0.0313	0.0652	0.1793	0.1486	0.022	0.0213	0.0959	0.9253	0.2251	0	0.158	0	0.4978	0.0313	0.005	0.0809	NA
Incertae_Sedis_XIII.Mogibacterium	0.0044	0.0038	0.0432	0.025	0.0301	0.0163	0.015	0	0	0.0201	0.0107	0	0	0.0032	0	0.0138	0.0057	0.0032	0	0.0157	0.0332	0.0106	0.3385	0.0063	0.0038	0.0038	0	0.0157	0.0038	0.0094	0	0.0426	0	0.0169	0	0.0182	0	0.0032	0.0032	NA
Incertae_Sedis_XIII.unknown_genus	0.0132	0.0401	0.5943	0.1818	0.1009	0.0834	0.0157	0.042	0.0201	0.0157	0.0163	0.0032	0	0.0263	0	0.0896	0.0746	0.0025	0.0765	0.0809	0.0395	0.0182	0.652	0.0182	0.0113	0.1053	0.0257	0.0471	0.0063	0.0345	0.148	0.1611	0	0.2088	0	0.2345	0	0	0.0144	NA
Incertae_Sedis_XIV.Blautia	0.578	0.9416	0.5887	0.7059	1.0137	0.6413	0.7272	0.2896	2.7622	1.5529	0.3762	0.1912	0.1072	0.5849	2.0356	0.662	0.6043	0.4056	0.9379	2.5904	7.8609	0.81	0.9968	1.0639	0.3385	0.195	0.3918	0.237	27.7136	1.4795	4.9564	1.593	0.3793	3.601	1.0739	1.5315	0.553	2.6594	2.5002	NA
Incertae_Sedis_XIV.Howardella	0	0	0	0	0	0	0	0.6821	0.2144	0.1755	0	0	0	0	0	0	0	0	0	0	0	0	0	0	0	0	0	0	0	0	0	0	0.1912	0	0	0	0	0	0	NA
Incertae_Sedis_XIV.unknown_genus	0	0	0	0	0	0	0	0	0	0	0	0	0	0	0.005	0	0	0	0	0	0	0	0	0	0.0025	0	0	0	0.0175	0	0	0	0	0	0	0.0044	0	0	0	NA
Lachnospiraceae.Anaerosporobacter	0	0	0.0006	0	0	0.0038	0	0	0	0	0	0	0	0	0	0	0	0	0	0	0	0	0	0	0	0	0	0	0	0.0019	0	0.0038	0	0	0	0	0	0.0282	0	NA
Lachnospiraceae.Anaerostipes	0	0.005	0	0	0	0	0	0	0	0	0.042	0.0044	0.0144	0	0.0157	0.005	0	0.022	0	0	0.0032	0	0	0.0063	0	0	0.005	0.0063	0	0	0	0	0	0.0038	0.1078	0	0	0.0063	0	NA
Lachnospiraceae.Coprococcus	0.0621	0.0495	0.0282	0.005	0.0608	0.0376	0	0.0238	0.0338	0.0746	0.0201	0.0332	0.0226	0.0395	0.01	0.2188	0.005	0	0.0639	0.0395	0	0.0057	0.0439	0.0119	0.0094	0	0.0144	0.0106	0	0.0038	0	0.0276	0.01	0	0.0338	0.0032	0.0113	0	0	NA
Lachnospiraceae.Dorea	0.0163	0.0546	0.0163	0.163	0.2094	0.2389	0.0238	0.0276	0.153	0.015	0.0401	0.0044	0.059	0.0044	0.0038	0.0157	0.0414	0.0082	0.0991	0.0157	0.0032	0.0075	0.0439	0.0125	0.0182	0.0106	0.0081	0.0106	0	0.0207	0.0313	0.0276	0	0.0106	0.5918	0	0.0244	0.0339	0.0113	NA
Lachnospiraceae.Lachnobacterium	0	0	0	0	0	0	0	0	0	0	0.0038	0.0044	0	0	0.0038	0	0	0	0	0	0	0	0	0.0125	0	0	0	0	0	0.0044	0.0157	0	0	0	0	0	0	0	0	NA
Lachnospiraceae.Oribacterium	0.0113	0	0	0	0	0	0	0	0.005	0.0057	0	0	0	0	0.0081	0	0	0	0	0	0	0	0.0063	0.0063	0	0	0	0	0.0075	0	0	0.0019	0	0	0	0	0	0	0	NA
Lachnospiraceae.Parasporobacterium	0	0	0	0	0	0	0	0	0.005	0.0157	0	0	0	0	0	0	0	0	0	0.0069	0	0	0	0	0	0	0	0	0	0	0	0.0044	0	0	0	0	0	0	0	NA
Lachnospiraceae.Pseudobutyrivibrio	0.1266	0.0169	0	0.1699	0.0057	0.0125	0.1793	0.0471	0.2038	0.0821	0.0075	0.0025	0.0502	0.0132	0.1122	0.0828	0.1122	0	0.0376	0.0376	0.0533	0.1078	0.6207	0.3404	0	0.0075	1.3999	0	0	0.0207	0.0445	0.0125	0.1379	0.0144	0	0	0	0.0038	0.2251	NA
Lachnospiraceae.Roseburia	0.0383	2.9584	0.0144	0.0244	0.0865	0.0326	0.0245	0.0502	1.3635	4.3884	0.015	0.2533	0.0771	0.0489	0.069	0.1492	0.0633	0.0132	0.3762	0.0571	0.0746	0.0395	0	0.9416	0.0119	0	0.0307	0.0119	0.0094	0.0213	0.0502	0.0984	0.0564	0.0088	0.01	0	0.0182	0.0119	1.5353	NA
Lachnospiraceae.Syntrophococcus	0	0	0	0	0.0094	0.0125	0	0	0.0044	0.0044	0	0.0057	0	0	0	0	0.01	0	0.005	0.0069	0.0032	0	0	0	0	0	0	0	0	0	0	0.0113	0	0	0	0.0032	0	0.0019	0.0019	NA
Lachnospiraceae.unknown_genus	4.4637	3.423	1.3899	6.1407	4.4054	2.6199	4.8173	7.7562	4.0863	4.2486	6.6491	1.0444	1.5899	1.2501	6.1645	8.2377	4.6524	0.5962	2.5929	3.4669	1.1767	2.3904	8.7455	19.5862	2.5923	0.6646	28.0591	1.0821	2.1986	1.6645	12.677	4.542	5.7156	4.0148	2.6562	0.9134	1.0877	2.5422	3.1264	NA
Lactobacillaceae.Lactobacillus	0	0.0038	0.0025	0	0.2213	0.0038	0	0.0063	0.0038	0	0.0376	0	0	0	0	0.0044	0.005	0	0.0125	0.0063	0.1994	0.0075	0.0125	0	0.01	0.4194	0	0.0188	0.0075	0.052	0.0057	0.0044	0	0.0546	0.005	0.0219	0.0132	0.0251	0.1304	NA
Lactobacillaceae.unknown_genus	0	0	0	0	0	0	0	0	0	0	0	0	0	0	0	0	0	0	0	0	0.0024	0.0039	0	0	0	0	0	0	0	0.0032	0	0	0	0	0	0	0	0	0	NA
Leuconostocaceae.Leuconostoc	0	0	0.005	0.0326	0.069	0.0057	0	0	0.005	0	0.0163	0	0	0.0201	0	0.0044	0	0.0032	0	0.0075	0.0395	0.0088	0	0	0.0044	0.0094	0	0	0.1323	0.0225	0.0057	0.0332	0	0	0.0013	0.0282	0.0295	0.0125	0.0094	NA
Leuconostocaceae.Weissella	0.0081	0	0.0013	0.0082	0.0301	0	0.0057	0	0.0057	0	0.0113	0	0	0.0251	0	0.0088	0.0044	0	0.0038	0.0094	0.0106	0.0044	0	0	0	0	0	0	0.0088	0.0032	0.0119	0.0038	0	0	0	0	0	0.0088	0.0032	NA
Micrococcaceae.Rothia	0	0	0	0.0038	0	0	0.0182	0	0	0	0	0	0	0	0	0.0044	0	0	0	0.0113	0	0	0	0	0	0	0	0	0	0	0	0	0	0	0.0088	0	0.0038	0	0	NA
Moraxellaceae.Acinetobacter	0	0	0.0038	0	0.0088	0	0	0	0	0	0.0144	0	0.0025	0	0	0	0	0	0	0.0056	0.0063	0	0.0063	0	0	0.01	0.01	0	0.0119	0.0032	0.0106	0.005	0	0	0	0	0	0.0025	0	NA
Moraxellaceae.Enhydrobacter	0	0	0	0	0.0075	0	0	0	0	0	0	0	0	0	0	0	0	0	0	0.0032	0	0	0	0	0	0	0	0	0.0025	0	0	0	0	0	0	0	0	0.0032	0.0038	NA
NA.TM7_genera_incertae_sedis	0.0044	0.0395	0	0.0539	0	0	0.0144	0	0.0834	0.0106	0.0777	0	0.0126	0	0	0	0.0044	0	0.0583	0.0596	0.2269	0.0069	0.0125	0	0.0019	0.0094	0	0	0	0.0972	0	0.032	0.0063	0	0.0257	0.0182	0.0144	0.0508	0.0144	NA
Neisseriaceae.Microvirgula	0	0	0	0	0.015	0	0	0	0.0032	0	0.0075	0	0	0.0069	0	0	0	0	0.0044	0.0044	0	0	0	0	0	0	0	0	0	0	0	0	0	0	0	0	0.015	0	0	NA
Oxalobacteraceae.Oxalobacter	0	0.0232	0	0	0	0	0	0.0232	0.0057	0.0038	0	0	0	0	0	0	0.0157	0	0	0	0	0	0	0	0	0.0125	0	0	0	0	0	0	0	0.5009	0	0	0	0	0	NA
Pasteurellaceae.Actinobacillus	0	0	0	0.0038	0	0	0	0	0.0057	0.0063	0.0075	0	0.0038	0	0	0	0	0	0	0	0.0025	0	0	0	0	0	0	0	0	0.0044	0	0	0	0	0	0	0	0	0	NA
Pasteurellaceae.Pasteurella	0	0	0	0	0	0.0044	0	0	0	0	0	0	0	0	0	0	0	0	0	0.0025	0.0589	0	0	0	0	0	0	0	0	0	0	0	0	0	0	0	0	0	0	NA
Pasteurellaceae.unknown_genus	0.005	0	0	0	0	0.0032	0	0	0	0	0	0	0	0	0	0	0	0	0	0	0.0558	0	0	0	0	0	0	0	0	0.005	0.0057	0	0	0	0	0	0	0	0.0019	NA
Peptococcaceae.Peptococcus	0	0.0032	0	0	0.0182	0	0	0.0471	0	0.0088	0.0294	0	0	0	0.0081	0	0	0	0	0	0	0.089	0	0	0	0.0057	0	0	0	0	0	0.0608	0	0	0	0	0	0	0	NA
Peptostreptococcaceae.Peptostreptococcus	0	0	0	0	0	0	0	0	0	0	0.0075	0.0025	0	0	0	0	0	0	0.0032	0.0081	0	0	0	0	0	0	0	0	0	0	0	0	0	0	0	0	0	0	0	NA
Peptostreptococcaceae.Sporacetigenium	0	0.0088	0.0094	0.0978	0.084	0.015	0.0106	0	0.2495	0	0.0464	0.0081	0	0.0288	0.005	0.0182	0.0113	0.0006	0.0708	0	0.1962	0.0395	0.0313	0	0.0125	0.0182	0.015	0	0.0288	0.0458	0.0088	0.0257	0	0.0106	0.0106	0.0125	0.0106	0.0157	0.0069	NA
Peptostreptococcaceae.Tepidibacter	0	0.0244	0.0025	0.0088	0.0928	0.0439	0.005	0.0063	0.005	0	0.0038	0	0	0	0	0.047	0	0	0.0088	0	0.0263	0.0081	0.0313	0	0.0069	0.0082	0.0263	0	0	0.0188	0.0057	0.0207	0	0.0401	0	0.0019	0.0032	0	0.0063	NA
Peptostreptococcaceae.unknown_genus	0.0063	0.2157	0.1066	0.7385	1.7385	0.3711	0.1805	0.0477	1.8049	0.0445	0.4131	0.1066	0.0382	0.1053	0.0357	0.4175	0.0752	0.0376	0.4351	0	1.1729	0.5366	0.558	0.0313	0.0539	0.1059	0.205	0.0546	0.1404	0.4721	0.1304	0.4664	0.01	0.746	0.094	0.2439	0.1034	0.0508	0.1185	NA
Porphyromonadaceae.Barnesiella	0.173	0.4476	0.232	0.2489	0	1.0269	0.2539	0.0921	0.0319	0.0508	0	0	0	0.2232	0	0	0.6796	0	0.0357	2.7484	0	0	0	0.5724	0	0.7197	0	0	0	0.0853	0	0	0	2.1792	0	0	0	0.3135	2.0651	NA
Porphyromonadaceae.Butyricimonas	0.3235	0.1241	0.0219	0	0.0138	0.0407	0	0.0915	0.1204	0.0853	0	0	0	0.163	0	0.0057	0.0257	0	0	0	0	0	0.2132	0	0	0	0	0.0408	0	0	0	0	0	0	0	0	0	0	0	NA
Porphyromonadaceae.Odoribacter	0.6169	0	0	0.0282	0.005	0.074	0.1548	0.2062	0.0771	0.1499	0	0	0	0.2238	0.5279	0.1385	0.1724	0	0.0414	0.6307	0	0	0.257	0.2332	0.1718	0.0433	0	0	0	0.0194	0	0.0276	0.573	0	0	0	0.0163	0.0044	0.2263	NA
Porphyromonadaceae.Parabacteroides	3.2656	1.3059	0.4583	1.2344	0.0759	0.3147	0.8094	2.0011	1.3391	1.0939	0.0088	0.2545	1.025	1.9303	2.3158	14.2631	2.9522	0.215	0.1392	0.2019	0.4884	2.0118	0.4765	4.3684	13.1641	1.5052	2.8261	1.7736	2.2243	0.1687	1.0708	0.6344	6.4993	2.8788	0.0032	0.4269	0.1705	2.7697	0.6106	NA
Porphyromonadaceae.Porphyromonas	0	0	0	0	0	0	0	0	0	0	0	0.0081	0	0.0038	0	0	0	0	0	0	0	0	0	0	0.0038	0	0	0	0	0.0056	0	0	0	0	0	0	0	0	0	NA
Porphyromonadaceae.unknown_genus	0.2113	0.0032	0.0752	0.0401	0	0.4019	0.0614	0.5611	0.3818	0.5435	0	0.0119	0	0.0119	0	0.0044	0.0219	0	0	0	0	0	0	0.0984	0.158	0.2219	0	0	0.0044	0	0	0	0	0.022	0	0	0	0	0	NA
Prevotellaceae.Paraprevotella	1.225	0.0032	0	0	5.584	0.8482	0	1.1021	0.1454	0.1887	0	0	0	0.0213	8.4791	0.0113	0	0	0	0	0	0	0	0	0	0	0	0	0	0	0	0	0	0	0	0	0	0.094	0.1962	NA
Prevotellaceae.Prevotella	0.5567	0	0.0683	0.0163	0.269	0.195	4.5721	0.9993	1.9334	14.3747	0	0.2313	0.0395	0.0464	5.742	0.0125	0.0244	0	0	0	0	0.0106	0	0.0665	0.0157	0	0	0	0	0	0	0.0414	0	0	0	0	0.0044	0	0.0019	NA
Prevotellaceae.unknown_genus	0.005	0	0.0013	0	0.0138	0.0088	0.0044	0.9673	1.7917	1.2331	0	0	0.0063	0	0.0565	0	0.0094	0	0	0.3661	0	0	0	0.1649	0.0044	0	0	0	0	0	0	0	0	0	0	0	0	0	0	NA
Propionibacteriaceae.unknown_genus	0	0	0	0	0.0035	0	0	0	0	0	0	0	0	0	0	0	0	0	0	0	0	0	0	0	0	0	0	0	0	0	0	0	0	0	0	0	0.0049	0.0049	0	NA
Pseudomonadaceae.Pseudomonas	0	0.0044	0	0	0	0	0.0144	0.069	0	0	0.0263	0	0	0	0	0.005	0.0038	0	0.0107	0	0.0106	0	0	0	0.0069	0	0	0	0.0057	0	0	0	0	0	0	0	0	0	0	NA
Pseudomonadaceae.unknown_genus	0	0	0	0	0	0	0	0.0063	0	0	0.0113	0	0	0	0	0	0	0	0	0	0.0019	0	0	0	0	0	0	0	0.0032	0	0	0	0	0	0	0	0	0	0	NA
Rhodobacteraceae.unknown_genus	0	0	0	0	0	0	0	0	0	0.005	0.0032	0.0044	0	0	0	0	0	0	0	0	0	0	0	0	0	0	0	0	0.0032	0	0	0	0	0	0	0	0	0	0	NA
Rikenellaceae.Alistipes	0.4689	0.1329	0.1392	0.1881	0.0407	0.0715	0.0903	0.1241	0.0295	0.0395	0.0269	0.064	0.0934	0.2928	0.4313	0.2451	0.5304	0.0088	0.0495	1.5936	0.0445	0.0401	0.4388	0.6984	0.0251	0.6739	0.1248	0.1197	0.0069	0.1179	0.0602	0.131	0.7624	0.7874	0	2.0105	0.1053	0.1862	0.4025	NA
Rikenellaceae.unknown_genus	0.005	0	0.0044	0	0	0	0.0038	0	0	0	0	0	0	0	0	0.0075	0.0075	0	0	0.0169	0	0	0.0125	0	0	0.0038	0	0	0	0	0	0	0	0.0213	0	0.0044	0.0032	0	0.0032	NA
Ruminococcaceae.Acetanaerobacterium	0.0119	0.005	0.0025	0.022	0.0038	0.0313	0.0144	0	0	0	0	0	0	0.0175	0	0.0144	0.0752	0	0	0.0194	0	0	0.0313	0.0119	0	0.037	0	0.0057	0	0	0	0.0094	0	0.0238	0	0.0188	0	0.01	0.0019	NA
Ruminococcaceae.Acetivibrio	0.0057	0	0	0.0614	0.089	0.0326	0	0	0	0.0057	0.0671	0.005	0	0	0	0.0188	0.0194	0	0.0213	0	0	0	0.0564	0.0376	0.032	0.2545	0	0.0671	0.094	0.0032	0	0.0113	0	0.0176	0	0.0044	0.01	0	0	NA
Ruminococcaceae.Anaerofilum	0	0	0	0.0038	0.0213	0	0.0057	0	0	0	0.0163	0.0533	0	0.0075	0	0.0032	0.0326	0	0	0.0326	0.0019	0.0615	0.0063	0	0.0125	0.1843	0	0.0564	0	0.0157	0.0044	0.0389	0	0.0144	0	0.015	0.0082	0.0032	0.0044	NA
Ruminococcaceae.Anaerotruncus	0.089	0.6539	0.4081	0.8758	1.3002	1.6143	1.9134	1.7886	0.0282	0.2696	4.9464	0.0934	0.1241	1.1184	0.3806	0.6677	2.7465	0	0.4689	1.4325	0.1216	0.2733	0.2382	0.3335	0.6351	0.731	0.1711	0.21	0.8946	0.0865	0.3874	0.9774	0.4476	0.8927	0.3053	1.0144	3.3383	0.3109	0.1555	NA
Ruminococcaceae.Butyricicoccus	0.1906	0.205	0.0082	0.1172	0.0433	0.0909	0.7103	0.7316	1.2695	0.3003	0.1442	0.1335	0.3636	0.0896	0.242	0.0351	0.1931	0.0257	1.8663	0.2038	1.5472	0.3103	1.956	1.724	0.1041	0.0552	0.4771	0.0909	2.7904	0	0.4903	0.7893	0.0853	1.3604	0	0.2614	0.0088	0.1216	0.0546	NA
Ruminococcaceae.Ethanoligenens	0.0038	0.0056	0.0025	0.0094	0	0.0038	0	0.0213	0	0.005	0.0458	0.0094	0	0.0201	0	0.0044	0.0357	0	0	0.0213	0	0.0094	0.0188	0.0188	0.0232	0.0094	0.01	0	0	0.0107	0	0.0295	0	0.0038	0.0025	0.1737	0.0032	0	0	NA
Ruminococcaceae.Faecalibacterium	24.4072	4.947	0.9793	2.0908	3.2462	9.8483	3.5108	12.0895	41.6576	19.7342	2.1848	2.4099	4.5144	0.1943	28.3481	10.5943	6.5726	0.0508	4.3082	8.066	11.8638	1.6551	15.2718	10.7492	1.0814	4.1389	8.7888	10.1592	21.0043	5.0141	3.8198	2.9415	4.7759	14.7257	0.0044	1.1222	2.371	4.4411	17.4973	NA
Ruminococcaceae.Hydrogenoanaerobacterium	0.0157	0	0	0	0.0138	0	0	0.0057	0	0.0063	0	0	0	0	0	0.0057	0	0	0	0	0	0	0	0	0	0	0	0	0	0	0.0633	0	0	0.0276	0	0.0044	0.005	0	0.0044	NA
Ruminococcaceae.Oscillibacter	7.8121	2.0394	0.1122	5.1821	2.724	0.8745	3.2293	7.2303	4.08	7.0804	1.0871	0.4457	0.4972	5.221	2.1585	2.5792	21.6739	0.0226	0.2157	6.777	0.1874	0.0771	2.0124	7.7193	3.3734	2.0156	1.5403	2.324	0.3247	1.5315	0.0596	0.3329	2.0563	4.0292	0.0514	3.7885	0.1824	0.2194	0.6558	NA
Ruminococcaceae.Papillibacter	0	0	0	0	0	0	0	0	0	0	0	0	0	0	0	0	0	0	0	0	0	0	0	0.0063	0.0032	0.005	0	0	0	0	0	0	0	0	0	0	0	0	0	NA
Ruminococcaceae.Ruminococcus	0.4088	0.0038	0.0176	7.3381	4.5464	0.0351	2.9478	2.2481	0.7116	0.2733	2.8851	0.5768	0.2175	0.0157	0.4639	1.6181	0.4062	0.0081	0	9.5461	4.1897	0.0715	0.6771	0.5335	0.4777	5.189	0.6783	0.1849	1.9008	3.0048	0.7116	2.7227	4.4411	2.497	0.0088	1.3034	17.2535	0.0207	3.6142	NA
Ruminococcaceae.Sporobacter	0	0.0032	0.0019	0.0759	0	0	0.1611	0	0	0.0727	0	0	0	0.0132	0	0	0.0357	0	0	0.0407	0	0	0.069	0	0.0125	0.0057	0.005	0.0226	0	0.0038	0	0.0176	0	0	0	0.0019	0	0	0	NA
Ruminococcaceae.Subdoligranulum	1.8638	6.9538	0.0314	4.1847	2.1391	7.9211	2.0199	3.018	11.0833	4.6329	3.7277	1.9315	0.6802	0.5203	5.2555	2.8111	5.231	0.5015	23.1716	9.1562	14.6492	0.3304	6.614	2.1278	0.5091	4.4298	2.9885	0.0495	8.7386	0.0464	1.4275	16.8949	0.1711	8.6973	0	2.4193	39.1712	4.2248	28.2847	NA
Ruminococcaceae.unknown_genus	5.2003	2.7077	1.4632	16.54	29.3493	12.2663	17.2654	8.3619	2.4582	18.8741	5.468	9.7367	2.2017	3.3095	2.7798	3.7239	12.8437	0.0784	2.7691	7.9895	0.9416	2.4412	9.2032	13.1572	3.2581	9.9969	2.4619	5.3589	2.3654	2.1861	4.6035	7.1262	3.3183	6.9344	0.7805	12.3309	11.7667	0.7592	8.5424	NA
Spiroplasmataceae.Spiroplasma	0	0.0132	0	0	0	0	0	0.0063	0	0	0.0276	0	0	0	0	0	0	0	0	0	0	0	0	0	0	0	0	0	0	0	0	0	0	0	0	0	0	0	0	NA
Staphylococcaceae.Gemella	0	0.0038	0	0.0201	0.0057	0.005	0.0175	0.042	0.0057	0.0088	0.0915	0.01	0	0.005	0	0	0	0	0.0433	0.005	0.0633	0.0715	0	0	0.0063	0	0	0.01	0.0213	0.0063	0.0094	0.0038	0	0	0	0.0201	0.005	0.0106	0.0257	NA
Staphylococcaceae.Staphylococcus	0	0.0032	0	0	0.0057	0	0.005	0.0113	0	0	0.0194	0	0	0.0069	0.0106	0	0.0094	0	0	0.0069	0	0	0	0	0	0	0	0	0.0038	0.0119	0	0	0	0	0	0	0	0	0	NA
Streptococcaceae.Lactococcus	0	0	0.0025	0.0608	0.0777	0.0176	0.0088	0	0.0057	0.01	0.0389	0.0038	0	0.0338	0	0.0169	0.0238	0	0.0445	0.0865	0.0382	0.0163	0.0251	0	0	0.0194	0.0063	0	0.042	0.2207	0.0044	0.0201	0	0.0119	0.0207	0.0106	0.0364	0.0276	0.0351	NA
Streptococcaceae.Streptococcus	0.0088	0.0464	0.042	0.3874	2.749	0.1799	0.1693	0.074	0.1505	0.1003	0.1893	0.0301	0.0589	0.0326	0.0131	0.1386	0.1981	0.0019	0.1172	0.0815	0.7899	0.6978	0.0627	0.0057	0.0696	0.0853	0.0125	0.0057	0.3843	0.3342	0.5116	0.1868	0.0138	0	0.2508	0.0032	0.0897	1.0633	0.3297	NA
Streptococcaceae.unknown_genus	0	0	0	0.005	0.0106	0	0	0	0	0	0.0138	0	0	0	0	0	0	0.0019	0	0.0175	0.0031	0	0.0063	0	0	0.0063	0	0	0.0038	0	0	0	0	0.0038	0	0	0.0038	0.005	0.0025	NA
Thermoanaerobacteraceae.Mahella	0	0	0	0	0.0295	0.0125	0	0	0	0	0	0	0	0	0	0	0.0163	0	0	0.0044	0	0	0	0	0	0.005	0	0	0	0	0	0	0	0	0	0.0032	0	0	0	NA
Thermoanaerobacteraceae.unknown_genus	0	0	0	0	0.0144	0.0044	0	0	0	0	0	0	0	0	0	0	0.0038	0	0	0	0	0	0	0	0	0	0	0	0	0	0	0	0	0	0	0	0	0	0	NA
unknown_family.unknown_genus	0.0082	1.9961	0.3203	3.0343	1.971	1.7121	0.9711	0.0063	0.2339	0.0157	0.1893	0.4282	0.3298	0.0063	0.973	0.9999	0.8821	0.0759	1.3184	0.0088	0.6463	0.5385	0.0125	0.5981	1.2532	0.0126	0.4351	0.5962	2.524	0.037	0.5485	0.7216	0.5511	3.0268	0.1097	0.6376	1.8513	0.2896	1.4056	NA
Veillonellaceae.Allisonella	0	0	0	0.0044	0.0188	0	0	0	0.0546	0.0508	0	0.0194	0	0	0	0	0	0.0013	0	0	0	0	0	0	0	0	0	0	0	0	0	0	0	0	0	0	0.2081	0	0	NA
Veillonellaceae.Dialister	3.6731	0.015	0.0075	0.1511	0.0464	0.0069	0.0082	0.0652	0	0	0.7843	0.1191	0.2551	0.0119	2.1729	0.9134	0	0	0.0947	1.8519	1.6225	0.0131	1.9999	1.8726	0.5241	0	0.0044	0	0.1825	0	0.0157	1.1397	0.3718	6.8811	0	0	0.783	0	0	NA
Veillonellaceae.Megamonas	0	0	0.0251	0	0	0	0.1392	0	0	0	0	0	0	0	0	0	0	0	0	0	0	0	0	0	0	0	0	0	0	0.0194	0	0	0	0	0	0	0	0	0	NA
Veillonellaceae.Megasphaera	0	0	0.0013	0	0	0	0	0	0	0	0	0	0	0	0	0	0	0	0	0	0.0063	0	0	0	0	0	0	0	0	0.0038	0	0	0.2564	0	0	0	0	0	0	NA
Veillonellaceae.Phascolarctobacterium	0	0.2044	0	2.6468	0.074	0.3529	23.2406	0	0	0	0	0	0	0	0	0	0	0.032	0.3348	0	0	0	0.0063	0	0	7.2911	1.8663	3.8857	0.0044	0.1486	0	0	0	0	0.0044	0.7065	0	0.2715	1.3667	NA
Veillonellaceae.Succinispira	0	0	0	0	0	0	0	0.0395	0.5467	0.1661	0	0	0	0.0382	0	0	0.0094	0	0	0	0	0	0	0	0	0	0	0	0	0	0	0	0	0	0	0	0	0	0	NA
Veillonellaceae.unknown_genus	0.0602	0	0	0.01	0.5323	0.0188	0.005	0.2357	2.8005	1.1335	0.0163	0.1348	0.0132	0.2464	0.0627	0.005	0.205	0.1016	0.005	0.0038	0	0	0.0188	0.0119	0.0175	0	0	0.0044	0.0032	0	0	0.0057	0	0.0307	0	0	0.01	0.0032	0	NA
Veillonellaceae.Veillonella	0	0.0376	0	0.0094	0.0257	0.0063	0.0138	0	0	0.0332	0.0038	0.0144	0.1348	0	0.0157	0.0057	0.005	0	0.0044	0.1009	0.4658	0.0596	0	0.037	0.0106	0.0094	0.0571	0.0044	1.9554	0	0.2282	0.005	0.0157	0.0288	9.8727	0.0025	0.0163	0.0194	0.0081	NA
Verrucomicrobiaceae.Akkermansia	6.1006	8.0616	0.0125	8.3274	8.0929	2.114	1.156	0.037	0.3354	0.1906	7.8597	0.395	0.2407	40.652	3.0174	9.8082	0.0709	3.9835	0	15.4874	0.0665	59.4119	10.5197	0.9303	52.8117	0.0777	0.0038	5.9758	0.0082	0.5279	37.16	41.5485	0.0903	0.0984	24.011	30.2226	0.0382	0.0044	11.8457	NA
Verrucomicrobiaceae.unknown_genus	0.005	0	0	0	0	0.0013	0	0	0.005	0	0	0	0	0	0	0	0	0	0	0.0075	0	0	0	0	0	0	0	0	0	0	0	0.0025	0	0	0	0	0	0	0	NA

## Sheet: Demographic-Diet patterns
	M=1	year	White=0	None=0	None=0	None=0	None=0	None=0	Not a problem=0	Not a problem=0
	F=0		Hispanic=1	Yes=1	One time per weak=1	One time per weak=1	Yes=1	Yes=1	Minor problem=1	Minor problem=1
			Multi=2		7 times a week (daily) =7	7 times a week (daily) =7			Moderate problem=2	Moderate problem=2
									Serious problem=3	Serious problem=3
									Not aveilable=NA	Not aveilable=NA
ID	Gender	Age	Ethnicity	GF/CF	Pro-Biotics (Average consumption frequences per week)	Seafood consumption* (Average consumption frequences per week)	Nutritional supplement	Current medications	Eats too much/too little	Extremely limited diet
N01	1	12	0	0	0	0	1	0	NA	NA
N02	1	13	0	0	0	0	0	0	NA	NA
N03	1	5	0	0	1	0	0	0	NA	NA
N04	1	12	0	0	1.5	1	0	0	NA	NA
N05	1	4	0	0	7	1	1	0	NA	NA
N06	1	4	0	0	7	1	1	0	NA	NA
N07	1	8	0	0	0	0	0	0	NA	NA
N08	1	13	0	0	0	0.5	0	0	NA	NA
N09	1	6	0	0	0	0.5	0	0	NA	NA
N10	1	4	0	0	0	0	0	0	NA	NA
N11	1	5	0	0	3.5	1	0	0	NA	NA
N12	1	6	1	0	0	1	0	1	NA	NA
N13	1	3	1	0	0	1	0	0	NA	NA
N14	0	14	0	0	0	0	1	0	NA	NA
N15	0	4	0	0	0	0	1	0	NA	NA
N16	0	4	0	0	4.5	0	1	0	NA	NA
N17	1	16	0	0	0	0	1	0	NA	NA
N18	1	8	2	0	0	0	0	1	NA	NA
N19	1	16	0	0	7	0	0	0	NA	NA
N20	1	10	0	1	1	0.1	1	0	NA	NA
A01	1	6	1	0	7	0	0	0	2	2
A02	1	5	2	0	0	0	1	1	1	1
A03	1	8	0	0	0	0	1	1	3	3
A04	1	11	3	0	0	0	0	0	0	0
A05	1	11	0	0	7	0	0	1	0	1
A06	1	9	0	0	7	0	1	0	1	3
A07	1	6	0	0	0	0	1	1	2	3
A08	1	6	0	1	7	3	1	0	0	3
A09	1	4	0	0	7	0	1	0	0	2
A10	0	4	0	0	7	3	1	0	3	3
A11	1	5	2	0	0	0	1	1	1	1
A12	1	4	0	0	0	0	0	0	NA	NA
A13	0	5	0	1	3	0	1	1	0	2
A14	1	6	0	1	7	7	1	0	0	3
A15	1	3	0	1	0	7	1	0	0	3
A16	1	7	2	0	0	1.5	0	1	1	1
A17	1	11	1	0	7	0	0	0	1	3
A18	1	9	2	0	3.5	0	1	0	2	3
A19	1	9	0	1	0	2	1	0	0	0
*: The survey of seafood consumption included fish, fish oil, and omega 3 fatty acids supplements. Seafood is the major source of omega-3 fatty acids which are beneficial to normal brain development (i.e., Docosahexaenoic acid (DHA) and eicosapentaenoic acid (EPA)) (Simopoulos 2011).
Reference
Simopoulos AP (2011) Evolutionary Aspects of Diet: The Omega-6/Omega-3 Ratio and the Brain. Molecular Neurobiology 44: 203-215.
