# Supplementary material for: Reduced Incidence of Prevotella and Other Fermenters in Intestinal Microflora of Autistic Children
Source: PubMed Central journal article supplement (PMC3700858; doi:10.1371/journal.pone.0068322), 2013-07-03
Supplement: pone.0068322.s002.pdf [file pone.0068322.s002.pdf]

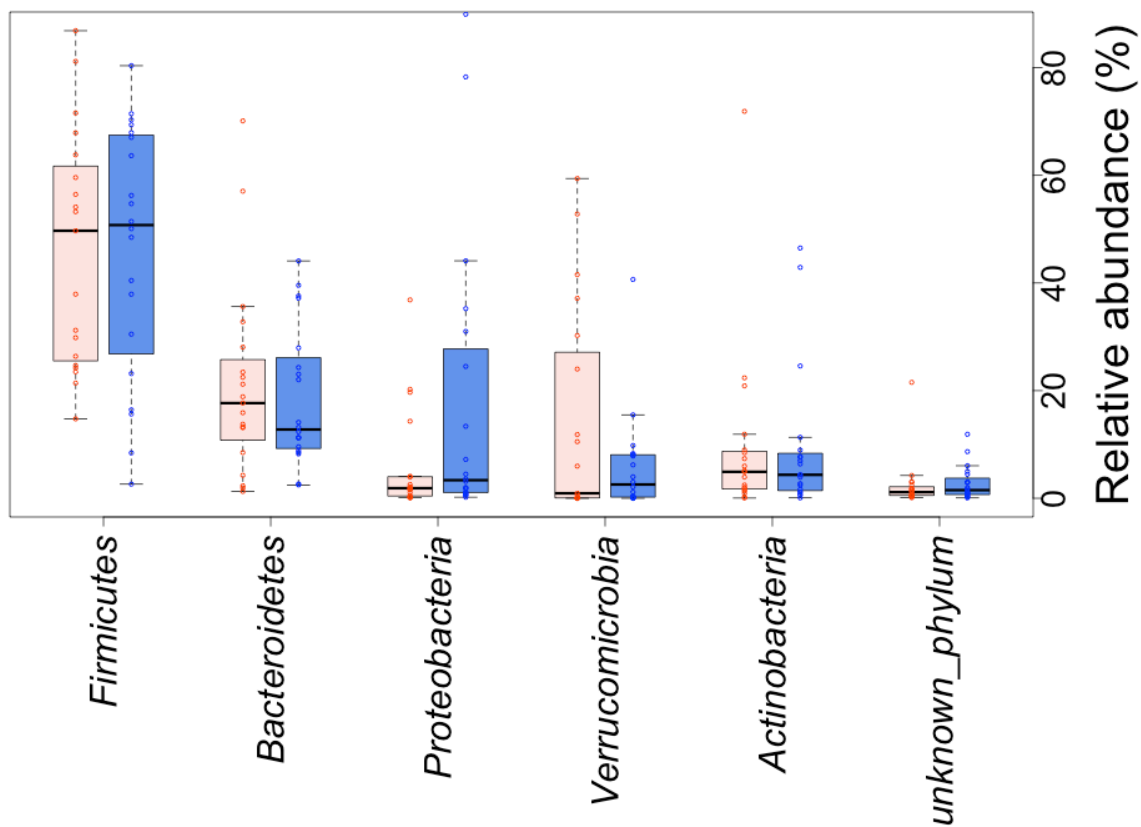

**Fig. S2. Relative abundance of gut microbiome at the phylum level.** Red boxes: autistic children, blue boxes: neurotypical children.
