# Supplementary material for: Reduced Incidence of Prevotella and Other Fermenters in Intestinal Microflora of Autistic Children
Source: PubMed Central journal article supplement (PMC3700858; doi:10.1371/journal.pone.0068322), 2013-07-03
Supplement: pone.0068322.s003.pdf [file pone.0068322.s003.pdf]

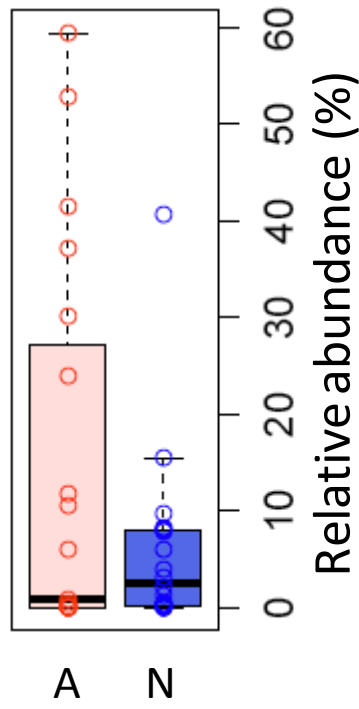

**Fig. S3. Distribution of relative abundance of the genus *Akkermansia* in 39 subjects. N: neurotypical, A: autistic group.**
