# Supplementary material for: Reduced Incidence of Prevotella and Other Fermenters in Intestinal Microflora of Autistic Children
Source: PubMed Central journal article supplement (PMC3700858; doi:10.1371/journal.pone.0068322), 2013-07-03
Supplement: pone.0068322.s005.pdf [file pone.0068322.s005.pdf]

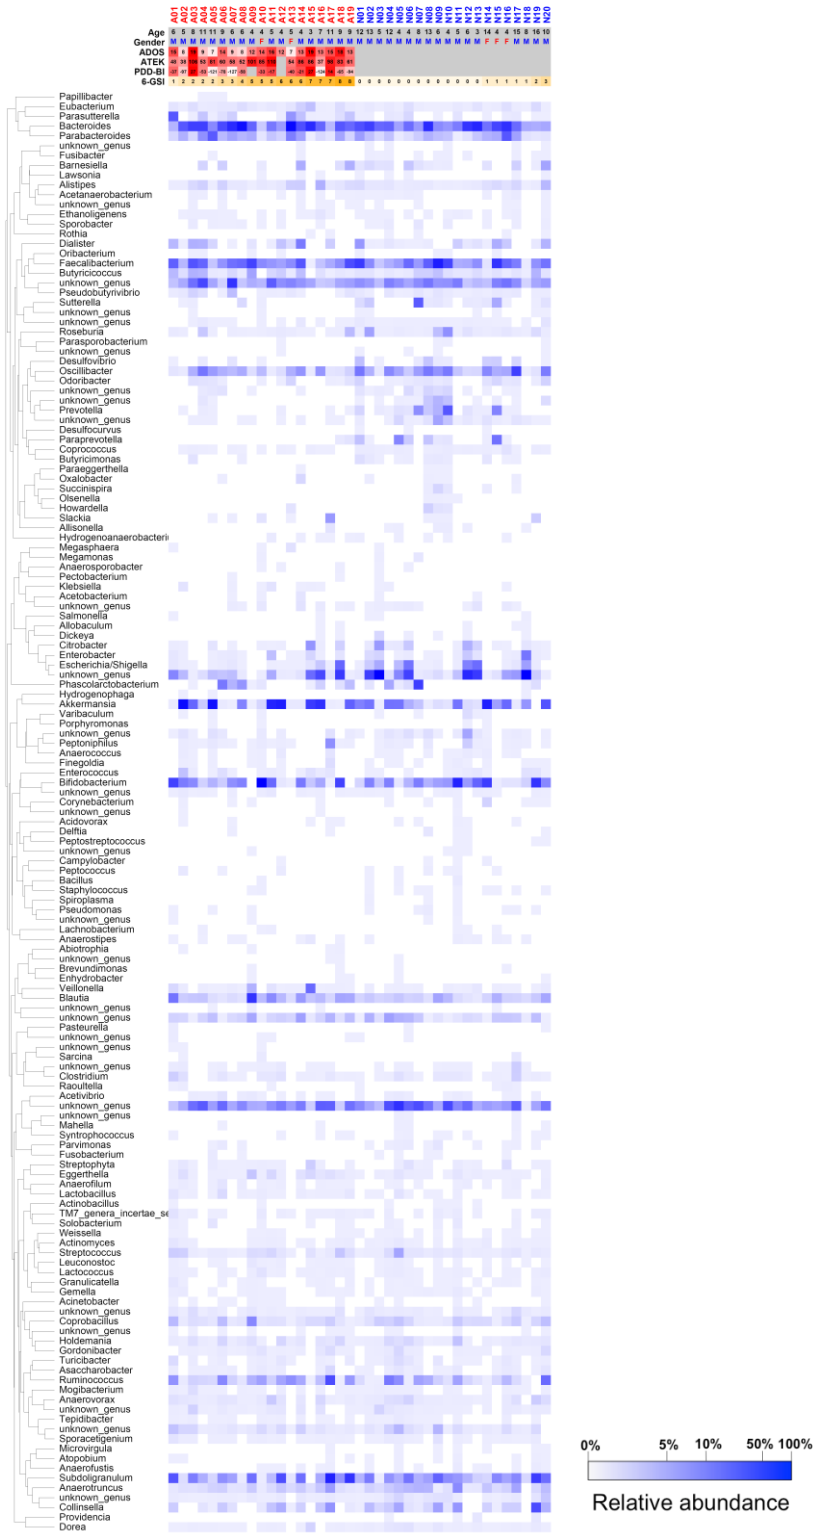

**Fig. S5. Heat map profiles and dendrograms of all identified genera.** A01-A19: autistic children, N01-N20: neurotypical children. The color represent averaged relative abundances in a log scale from 10 random sub-samplings.
