# Supplementary material for: Reduced Incidence of Prevotella and Other Fermenters in Intestinal Microflora of Autistic Children
Source: PLOS journal article supplement (doi:10.1371/journal.pone.0068322), 2013-07-03
Supplement: S1 (10.1371/journal.pone.0068322.s001) [file journal.pone.0068322.s001]

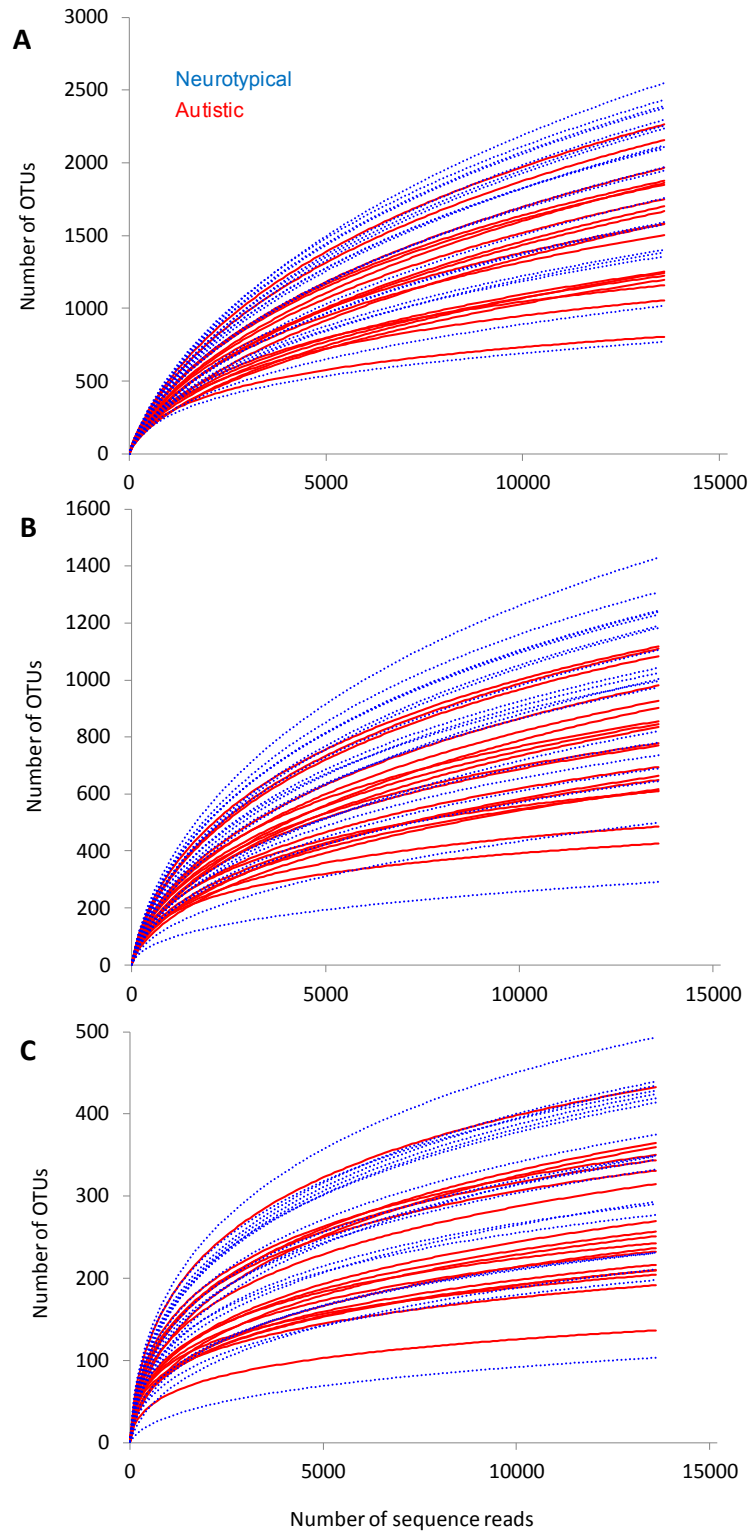

**Fig. S1. Rarefaction curves to show sequencing numbers and observed operating taxonomic units (OTUs) obtained by UCLUST. Sequence similarity thresholds at (a) 97%, (b) 95%, and (c) 90%.**
