# Supplementary material for: Reduced Incidence of Prevotella and Other Fermenters in Intestinal Microflora of Autistic Children
Source: PLOS journal article supplement (doi:10.1371/journal.pone.0068322), 2013-07-03
Supplement: S4 (10.1371/journal.pone.0068322.s004) [file journal.pone.0068322.s004]

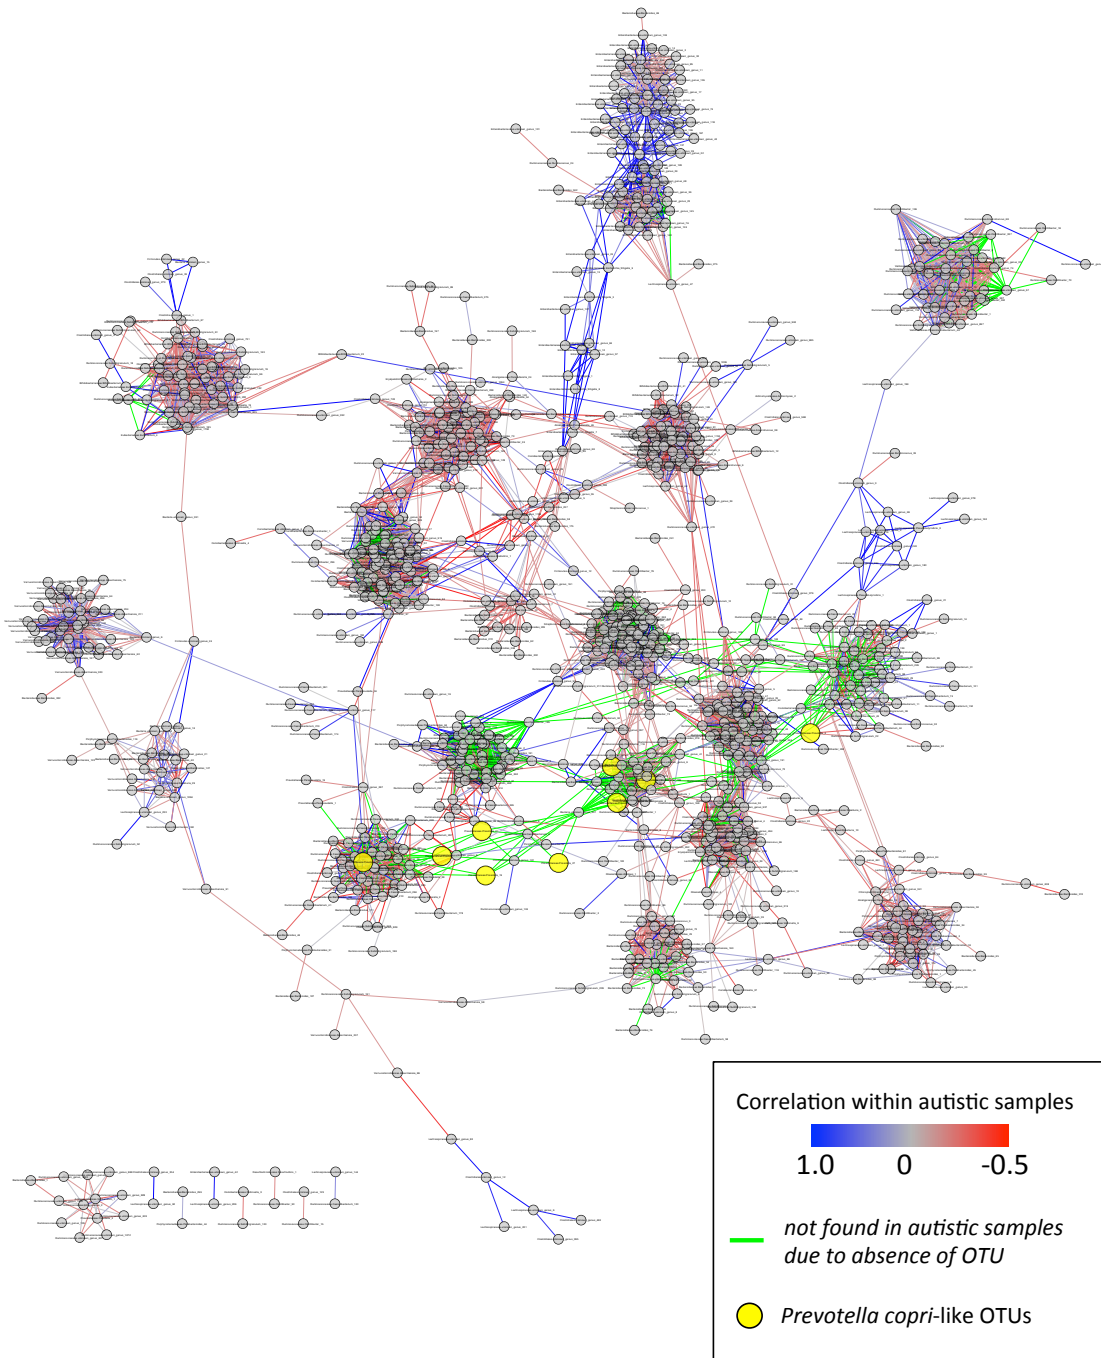

**Fig. S4. Co-occurrence network at the 97% OTU level.** OTU pairs that show positive correlation (Pearson's  $R > 0.8$ ) among normal samples are presented as a network. The edge colors represent correlation of each OTU pair among autistic samples, as indicated in legend. *Prevotella copri* like OTUs and their direct edges are highlighted in yellow and green, respectively, to show the extent of network perturbation resulted from the absence of the OTUs in autistic subjects.
