# Supplementary material for: Reduced Incidence of Prevotella and Other Fermenters in Intestinal Microflora of Autistic Children
Source: PLoS One. 2013 Jul 3;8(7):e68322. doi: 10.1371/journal.pone.0068322 (PMC3700858; doi:10.1371/journal.pone.0068322)
Supplement: Table S1 — Pyrosequencing data summary with the number of a total sequence reads and qualified sequence reads. Subject description: Neurotypical (N) and Autistic (A) children. (XLSX) [file pone.0068322.s006.xlsx]

## Sheet: Table S1
Table S1. Pyrosequencing data summary with the number of a total sequence reads and qualified sequence reads. Subject description: Neurotypical (N) and Autistic (A) children.
Subject ID	Subject description	Total sequences #	Qualified sequences #
N01	N	51837	23746
N02	N	52987	26326
N03	N	79139	46701
N04	N	51470	22064
N05	N	53466	22213
N06	N	63879	26188
N07	N	48537	21381
N08	N	35607	17156
N09	N	53791	20094
N10	N	47146	19328
N11	N	47295	25287
N12	N	52168	23583
N13	N	55706	27099
N14	N	50072	27258
N15	N	57447	25463
N16	N	52997	21863
N17	N	54602	21141
N18	N	75380	43412
N19	N	52407	25617
N20	N	56659	27186
A01	A	55065	29424
A02	A	60063	24336
A03	A	49571	15991
A04	A	43171	16267
A05	A	59110	30088
A06	A	44868	21717
A07	A	53074	20344
A08	A	36430	17687
A09	A	51190	29633
A10	A	49703	32744
A11	A	48341	19575
A12	A	60877	28639
A13	A	48550	19213
A14	A	49048	20954
A15	A	54599	25731
A16	A	60902	28284
A17	A	58397	26475
A18	A	55105	27784
A19	A	59135	30979
A-excl.	A	50829	8830
Total		2140620	987801
