# Supplementary material for: Reduced Incidence of Prevotella and Other Fermenters in Intestinal Microflora of Autistic Children
Source: PLoS One. 2013 Jul 3;8(7):e68322. doi: 10.1371/journal.pone.0068322 (PMC3700858; doi:10.1371/journal.pone.0068322)
Supplement: Table S2 — Microbial diversity indices with OTUs obtained by UCLUST (90, 95, and 97% similarity). (A) Chao1 estimator, (B) Shannon diversity index, (C) Shannon evenness index, and (D) Phylogenetic Diversity. (P-values were obtained by one-tailed Student’s t-test and Mann-Whitney test.) (XLSX) [file pone.0068322.s007.xlsx]

## Sheet: Table S2
Table S2. Microbial diversity indices with OTUs obtained by UCLUST (90, 95, and 97% similarity). (A) Chao1 estimator, (B) Shannon diversity index, (C) Shannon evenness index, and (D) Phylogenetic Diversity. (P-values were obtained by one-tailed Student's t-test and Mann-Whitney test.)
(A) Chao1 estimator
UCLUST threshold	0.9	0.95	0.97
Neurotypical	451	1453	3088
Autistic	364	1165	2533
P values (Student’s t-test/Mann-Whitney test)	0.013/0.010	0.010/0.008	0.014/0.008
(B) Shannon diversity index
UCLUST threshold	0.9	0.95	0.97
Neurotypical	3.32	4.57	5.63
Autistic	3.27	4.43	5.38
P values (Student’s t-test/Mann-Whitney test)	0.42/0.10	0.295/0.12	0.12/0.08
(C) Shannon evenness index
UCLUST threshold	0.9	0.95	0.97
Neurotypical	0.57	0.66	0.74
Autistic	0.58	0.66	0.73
P values (Student’s t-test/Mann-Whitney test)	0.35/0.38	0.46/0.21	0.25/0.14
(D) Phylogenetic Diversity (PD)
UCLUST threshold	0.9	0.95	0.97
Neurotypical	29.4	59.7	71.5
Autistic	24.9	51.2	62.8
P values (Student’s t-test/Mann-Whitney test)	0.018/0.021	0.039/0.021	0.062/0.031
