# Supplementary material for: Reduced Incidence of Prevotella and Other Fermenters in Intestinal Microflora of Autistic Children
Source: PLoS One. 2013 Jul 3;8(7):e68322. doi: 10.1371/journal.pone.0068322 (PMC3700858; doi:10.1371/journal.pone.0068322)
Supplement: Table S4 — Permutation-based tests on univariate and multivariate regression models between the autistic status/demographic/diet patterns and microbial diversity indices/top 10 genera with the highest AUC (A) among all samples and (B) within autistic samples. The coefficient for age, autism severity indices (ADOS, ATEK, PDD-BI), and GI index are the log odds ratios of genus abundance for a one unit change in the age, autism severity indices, and GI index, respectively. The coefficient for gender is the log odds ratio of genus abundance for males compared to females. P-values less than 0.05 are indicated in bold characters. (Coef: coefficient from linear regression, P: P value from permutation likelyhood ratio test for generalized linear model, SE: standard error for P value). (C) P values by permutation tests of canonical correlation analysis (CCA). (XLSX) [file pone.0068322.s009.xlsx]

## Sheet: Table_S4
Table S4. Permutation-based tests on univaraite and multivariate regression models between the autistic status/demographic/diet patterns and microbial diversity indices/top 10 genera with the highest AUC (A) among all samples and (B) within autistic samples. The coefficient for age, autism severity indices (ADOS, ATEK, PDD-BI), and GI index are the log odds ratios of genus abundance for a one uni…
(A) All samples
		Univariate				Multivariate
		Autistic status				Autistic status			Age			Gender			Glutan/Casein-Free Diet (yes/no)			Probiotics (times/week)			Seafood (times/week)			Nutritional Supplements (yes/no)
		Coef	P	SE		Coef	P	SE	Coef	P	SE	Coef	P	SE	Coef	P	SE	Coef	P	SE	Coef	P	SE	Coef	P	SE
Chao	0.97	0	0.017	0.00408791		0	0.012	0.00344325	-0.19	0.233	0.0133683	3.08	0.072	0.0081741	1.59	0.368	0.0152504	0.25	0.152	0.0113532	0.11	0.869	0.0106695	1	0.328	0.0148464
	0.95	0	0.018	0.00420428		0	0.011	0.00329833	-0.18	0.264	0.0139393	3.22	0.063	0.00768316	1.42	0.412	0.0155646	0.25	0.135	0.0108062	0.21	0.718	0.0142294	0.85	0.414	0.0155757
	0.9	-0.01	0.028	0.0052169		-0.01	0.008	0.00281709	-0.15	0.349	0.0150731	3.29	0.063	0.00768316	1.2	0.486	0.0158052	0.27	0.099	0.00944452	0.3	0.585	0.0155812	0.58	0.58	0.0156077
Shannon	0.97	-0.62	0.202	0.0126963		-1.29	0.075	0.00832917	-0.05	0.711	0.0143345	2.06	0.172	0.0119338	1.18	0.465	0.0157726	0.17	0.248	0.0136563	0.16	0.744	0.0138009	1.7	0.11	0.00989444
	0.95	-0.25	0.598	0.0155047		-0.6	0.31	0.0146253	-0.07	0.589	0.0155589	1.7	0.229	0.0132876	1.15	0.477	0.0157947	0.17	0.214	0.0129693	0.14	0.756	0.0135818	1.35	0.168	0.0118227
	0.9	-0.09	0.847	0.0113838		-0.29	0.583	0.015592	-0.08	0.514	0.0158052	1.53	0.263	0.0139223	1.18	0.45	0.0157321	0.18	0.204	0.012743	0.13	0.762	0.0134669	1.15	0.231	0.0133281
Shannon-Even	0.97	-3.53	0.494	0.0158103		-10.22	0.147	0.0111978	-0.07	0.608	0.0154381	1.91	0.184	0.0122533	1.23	0.434	0.015673	0.17	0.229	0.0132876	0.17	0.705	0.0144213	1.51	0.139	0.0109398
	0.95	0.4	0.922	0.00848033		-2.89	0.568	0.0156645	-0.09	0.494	0.0158103	1.59	0.245	0.0136005	1.2	0.439	0.0156933	0.18	0.197	0.0125774	0.14	0.751	0.0136748	1.18	0.229	0.0132876
	0.9	1.12	0.702	0.0144636		-0.41	0.905	0.00927227	-0.1	0.438	0.0156894	1.46	0.279	0.0141831	1.21	0.438	0.0156894	0.18	0.199	0.0126253	0.13	0.761	0.0134862	1.01	0.293	0.0143927
PD	0.97	-0.03	0.097	0.00935901		-0.04	0.151	0.0113225	-0.04	0.764	0.0134277	1.79	0.204	0.012743	0.99	0.542	0.0157555	0.15	0.285	0.014275	0.14	0.773	0.0132465	1.48	0.15	0.0112916
	0.95	-0.04	0.066	0.00785137		-0.05	0.102	0.00957058	-0.03	0.826	0.0119885	1.8	0.205	0.0127662	1	0.542	0.0157555	0.16	0.253	0.0137474	0.12	0.81	0.0124056	1.54	0.131	0.0106695
	0.9	-0.11	0.031	0.00548079		-0.13	0.066	0.00785137	-0.02	0.898	0.00957058	1.77	0.22	0.0130996	0.77	0.642	0.0151603	0.17	0.242	0.0135438	0.15	0.779	0.0131209	1.62	0.122	0.0103497
Veillonellaceae.unknown_genus		-0.36	0	0		-0.53	0.002	0.0014128	-0.05	0.771	0.0132876	1.66	0.439	0.0156933	-0.27	0.884	0.0101264	0.12	0.523	0.0157947	0.35	0.507	0.0158098	1.54	0.22	0.0130996
Prevotellaceae.Prevotella		-0.19	0	0		-0.17	0.001	0.0009995	-0.24	0.152	0.0113532	2.44	0.217	0.013035	0.02	0.995	0.00223047	0.21	0.295	0.0144213	0.15	0.811	0.0123806	1.38	0.269	0.0140228
Lachnospiraceae.Coprococcus		-0.44	0	0		-0.56	0.001	0.0009995	-0.18	0.354	0.0151223	2.19	0.279	0.0141831	1.53	0.468	0.015779	0.21	0.238	0.0134669	0.08	0.883	0.0101642	1.4	0.236	0.0134277
Lactobacillaceae.Lactobacillus		0.05	0.171	0.0119063		0.02	0.742	0.013836	-0.1	0.429	0.0156512	1.31	0.324	0.0147995	1.2	0.437	0.0156854	0.15	0.346	0.0150427	0.13	0.753	0.0136378	0.91	0.317	0.0147143
Prevotellaceae.unknown_genus		-0.03	0.06	0.00750999		-0.06	0.085	0.00881901	-0.1	0.414	0.0155757	1.58	0.272	0.0140718	2.51	0.222	0.0131422	0.13	0.331	0.0148808	-0.03	0.952	0.00675988	0.74	0.417	0.015592
Alcaligenaceae.Sutterella		-0.04	0.021	0.0045342		-0.08	0.034	0.00573097	-0.06	0.691	0.0146123	1.53	0.397	0.0154723	2.93	0.204	0.012743	0.11	0.469	0.015781	0.34	0.607	0.0154451	1.03	0.304	0.0145459
Lachnospiraceae.Roseburia		0	0.244	0.0135818		0	0.494	0.0158103	-0.1	0.397	0.0154723	1.46	0.28	0.0141986	1.38	0.391	0.0154311	0.16	0.259	0.0138535	0.12	0.795	0.0127662	0.82	0.372	0.0152845
Porphyromonadaceae.Butyricimonas		-0.07	0.087	0.00891241		-0.05	0.297	0.0144496	-0.06	0.645	0.0151319	1.49	0.284	0.0142599	0.86	0.593	0.0155355	0.13	0.378	0.0153335	0.14	0.745	0.0137831	1.25	0.186	0.0123046
Eubacteriaceae.Eubacterium		0.02	0.071	0.00812151		0.01	0.787	0.0129472	-0.1	0.401	0.0154983	1.4	0.307	0.014586	1.18	0.446	0.0157189	0.17	0.241	0.0135248	0.08	0.868	0.010704	0.92	0.333	0.0149034
Prevotellaceae.Paraprevotella		-0.03	0.017	0.00408791		-0.06	0.004	0.001996	-0.22	0.169	0.0118507	3.5	0.107	0.00977502	0.62	0.772	0.0132671	0.38	0.064	0.00773977	0.43	0.583	0.015592	2.64	0.035	0.00581163
Prevotella qPCR		-14.31	0	0		-14.28	0.002	0.0014128	-0.26	0.131	0.0106695	2.88	0.164	0.0117091	0.24	0.901	0.00944452	0.27	0.192	0.0124554	0.1	0.873	0.0105295	1.72	0.184	0.0122533
Age		-0.13	0.163	0.0116804
Gender		0.41	0.962	0.00604616
GFCF Diet		1.91	0.104	0.00965319
Probiotics		0.18	0.095	0.00927227
Seafood		0.46	0.101	0.00952885
Nutritional Supplement		1.18	0.096	0.00931579
(B) Autistic samples
		Age			Gender			ADOS			ATEK			PDD.BI			GSI
Family. Genus		Coef	P	SE	Coef	P	SE	Coef	P	SE	Coef	P	SE	Coef	P	SE	Coef	P	SE
Veillonellaceae (unknown genus)		0.281814	0.363	0.0152063	1.31522	0.607	0.0154451	-0.263142	0.386	0.0153949	0.0348178	0.326	0.0148231	0.00689015	0.736	0.0139393	-0.113995	0.728	0.0140718
Prevotellaceae Prevotella		0.86029	0.07	0.00806846	-1.77527	0.526	0.01579	-0.323584	0.382	0.0153648	-0.0460326	0.281	0.014214	0.0386803	0.155	0.0114444	-0.230169	0.573	0.015642
Lachnospiraceae Coprococcus		0.372886	0.192	0.0124554	-1.85621	0.365	0.0152242	0.0424719	0.866	0.0107724	0.0268738	0.37	0.0152676	0.000219283	0.988	0.00344325	-0.596127	0.065	0.00779583
Lactobacillaceae Lactobacillus		1.71527	0.56	0.0156971	-19.0419	0.369	0.0152591	6.51694	0.047	0.00669261	-0.462586	0.187	0.0123301	-0.167092	0.377	0.0153255	-4.51537	0.185	0.012279
Prevotellaceae (unknown genus)		2.16291	0.139	0.0109398	-5.34528	0.579	0.0156128	-0.592504	0.62	0.0153493	-0.144696	0.312	0.0146511	0.101091	0.246	0.0136192	-0.546004	0.684	0.0147018
Alcaligenaceae Sutterella		0.297176	0.943	0.00733151	32.0092	0.416	0.0155867	-3.64949	0.431	0.0156601	-0.172538	0.706	0.0144071	0.18575	0.538	0.0157657	1.49507	0.759	0.0135248
Lachnospiraceae Roseburia		21.5984	0.069	0.00801492	6.31776	0.925	0.00832917	-1.25235	0.899	0.00952885	-0.856705	0.428	0.0156466	0.361249	0.583	0.015592	1.75105	0.862	0.0109067
Porphyromonadaceae Butyricimonas		1.61523	0.324	0.0147995	2.88386	0.817	0.0122275	-0.189638	0.89	0.00989444	0.0904318	0.609	0.0154311	0.0308739	0.803	0.0125774	-1.86182	0.302	0.0145188
Eubacteriaceae Eubacterium		-1.76777	0.739	0.0138881	-26.5907	0.494	0.0158103	9.13783	0.12	0.0102762	0.222864	0.704	0.0144355	-0.287644	0.45	0.0157321	-9.79087	0.159	0.0115637
Prevotellaceae Paraprevotella		1.72265	0.091	0.009095	5.42837	0.424	0.0156277	0.521332	0.545	0.0157472	-0.0283981	0.743	0.0138185	-0.0410102	0.524	0.0157932	1.33769	0.18	0.0121491
		GF_CF			Probiotics			Seafood			Nutritional_Supplements			Eats_too_much			Extremely_limited_diet
Family. Genus		Coef	P	SE	Coef	P	SE	Coef	P	SE	Coef	P	SE	Coef	P	SE	Coef	P	SE
Veillonellaceae (unknown genus)		0.665614	0.813	0.0123301	0.0136196	0.954	0.0066245	0.443628	0.267	0.0139897	-0.408058	0.815	0.012279	0.672533	0.523	0.0157947	-0.100515	0.892	0.00981509
Prevotellaceae Prevotella		-4.8187	0.111	0.00993373	-0.255247	0.289	0.0143345	0.942451	0.106	0.00973468	1.35369	0.493	0.0158098	-0.620234	0.642	0.0151603	-0.680771	0.425	0.0156325
Lachnospiraceae Coprococcus		2.52724	0.235	0.013408	-0.631796	0.023	0.00474036	0.204428	0.52	0.0157987	-1.93072	0.21	0.0128802	0.0741737	0.927	0.00822624	1.48208	0.051	0.00695694
Lactobacillaceae Lactobacillus		-5.35418	0.806	0.0125046	3.31588	0.135	0.0108062	-1.36281	0.716	0.0142599	20.7247	0.217	0.013035	-13.0205	0.205	0.0127662	-0.893046	0.88	0.0102762
Prevotellaceae (unknown genus)		-10.8325	0.29	0.0143492	-0.728689	0.367	0.0152418	2.28373	0.203	0.0127197	3.32841	0.616	0.01538	-1.34913	0.778	0.0131422	-1.33137	0.603	0.0154723
Alcaligenaceae Sutterella		17.056	0.654	0.0150427	1.66272	0.597	0.015511	-0.148267	0.976	0.00483983	7.98554	0.77	0.0133079	10.7475	0.537	0.015768	-0.647119	0.957	0.00641491
Lachnospiraceae Roseburia		74.8573	0.319	0.014739	0.247505	0.963	0.00596917	12.1942	0.301	0.0145051	52.9518	0.343	0.0150117	41.1133	0.234	0.0133882	-57.0236	0.053	0.00708456
Porphyromonadaceae Butyricimonas		16.5384	0.227	0.0132465	-1.06807	0.337	0.0149476	-0.0231822	0.992	0.00281709	-1.31462	0.884	0.0101264	6.88214	0.23	0.0133079	0.997636	0.783	0.013035
Eubacteriaceae Eubacterium		24.6002	0.57	0.0156557	-6.33044	0.127	0.0105295	7.33728	0.309	0.0146123	-18.1314	0.567	0.0156688	-33.788	0.107	0.00977502	28.8957	0.066	0.00785137
Prevotellaceae Paraprevotella		15.219	0.054	0.00714731	0.670654	0.241	0.0135248	-0.187425	0.843	0.0115044	7.33884	0.171	0.0119063	6.17629	0.084	0.00877177	-5.76879	0.043	0.00641491
	(C) CCA
		Age, Gender, Ethnicity, GFCF Diet, Probiotics, Seafood, Nutritional Supplement		Age, Gender, Ethnicity		GFCF diet, Probiotics, Seafood, Nutritional Supplement
	Top 10 Genera	0.195195		0.527528		0.111111
	Diversity Indices	0.867868		0.587588		0.755756
