# Supplementary material for: Reduced Incidence of Prevotella and Other Fermenters in Intestinal Microflora of Autistic Children
Source: PLoS One. 2013 Jul 3;8(7):e68322. doi: 10.1371/journal.pone.0068322 (PMC3700858; doi:10.1371/journal.pone.0068322)
Supplement: Table S5 — Relative abundance (Median values (%) and 25/75 percentiles) of 15 phyla detected throughout all subjects. (XLSX) [file pone.0068322.s010.xlsx]

## Sheet: Table_S5
Table S5. Relative abundance (Median values (%) and 25/75 percentiles) of 15 phyla detected throughout all subjects.
Phylum	Median (25%/75%)			Student’s t-test			Mann-Whitney test
	Neurotypical	Autistic		P	P adj.		P	P adj.
Firmicutes	50.8(28.7/67.3)	49.7(25.5/61.7)		0.5	0.5		0.48	0.49
Bacteroidetes	12.8(9.41/25.2)	17.7(10.8/25.8)		0.3	0.4		0.39	0.45
Actinobacteria	4.36(1.56/8.06)	4.93(1.74/8.73)		0.48	0.5		0.49	0.49
Proteobacteria	3.37(1.11/26.1)	1.88(0.42/4.02)		0.04	0.26		0.06	0.28
Verrucomicrobia	2.57(0.23/8.07)	0.93(0.08/27.1)		0.04	0.26		0.37	0.45
Unknown phylum	1.52(0.74/3.39)	1.14(0.55/2.16)		0.4	0.46		0.34	0.45
Cyanobacteria	<0.01(0/0.03)	0.01(<0.01/0.03)		0.33	0.4		0.2	0.3
TM7	<0.01(0/0.04)	0.01(0/0.02)		0.33	0.4		0.34	0.45
Fusobacteria	0(0/<0.01)	0(0/<0.01)		0.13	0.26		0.18	0.3
Acidobacteria	0(0/<0.01)	0(0/<0.01)		0.12	0.26		0.16	0.3
Bacteria_incertae_sedis	0(0/<0.01)	0(0/0)		0.16	0.27		0.16	0.3
Chloroflexi	0(0/0)	0(0/<0.01)		0.13	0.26		0.09	0.28
Tenericutes	0(0/0)	0(0/<0.01)		0.07	0.26		0.04	0.28
Synergistetes	0(0/0)	0(0/<0.01)		0.08	0.26		0.04	0.28
Thermotogae	0(0/0)	0(0/<0.01)		0.11	0.26		0.09	0.28
Nitrospira	0(0/0)	0(0/<0.01)		0.17	0.27		0.18	0.3
