# Supplementary material for: Reduced Incidence of Prevotella and Other Fermenters in Intestinal Microflora of Autistic Children
Source: PLoS One. 2013 Jul 3;8(7):e68322. doi: 10.1371/journal.pone.0068322 (PMC3700858; doi:10.1371/journal.pone.0068322)
Supplement: Table S9 — The list of bacterial groups that presented in the co-occurrence networks of the enterotype study (Arumugam et al. 2011)*. The genera in bold were used for our PCA analysis. The rest of genera were not considered because of no/little observation through our samples. (XLSX) [file pone.0068322.s014.xlsx]

## Sheet: Table_S9
Table S9. The list of bacterial groups that presented in the co-occurrence networks of the enterotype study (Arumugam et al. 2011)*. The genera in bold were used for our PCA analysis. The rest of genera were not considered because of no/little observation through our samples.
Genus
Akkermansia	Gordonibacter	Prevotella
Alkaliphilus	Helicobacter	Rhodospirillum
Bacteroides	Holdemania	Ruminococcaceae
Catenibacterium	Lachnospiraceae	Ruminococcus
Clostridiales	Lactobacillus	Slackia
Desulfovibrio	Leuconostoc	Sphingobacterium
Dialister	Marvinbryantia	Staphylococcus
Eggerthella	Methanobrevibacter	Subdoligranulum
Escherichia/Shigella	Parabacterioides	Symbiobacterium
Geobacter	Peptostreptococcaceae	Veillonella
*: Arumugam M, et al. (2011) Enterotypes of the human gut microbiome. Nature 473(7346): 174-180.
