# Supplementary material for: Reduced Incidence of Prevotella and Other Fermenters in Intestinal Microflora of Autistic Children
Source: PLoS One. 2013 Jul 3;8(7):e68322. doi: 10.1371/journal.pone.0068322 (PMC3700858; doi:10.1371/journal.pone.0068322)
Supplement: Table S10 — List of genera considered for principal component analysis. Main contributors of the first and second principal components are indicated in bold characters. (XLSX) [file pone.0068322.s015.xlsx]

## Sheet: Table_S10
Table S10. List of genera considered for principal component analysis. Main contributors of the first and second principal components are indicated in bold characters.
Family. Genera	PC1	PC2
Bacteroidaceae.Bacteroides	0.331055	0.120061
Porphyromonadaceae.Parabacteroides	0.260626	-0.00354984
Desulfovibrionaceae.Desulfovibrio	0.197896	-0.413784
Verrucomicrobiaceae.Akkermansia	0.0900421	0.273325
Prevotellaceae.Prevotella	0.0841543	-0.354192
Veillonellaceae.Veillonella	0.0811784	0.442423
Enterobacteriaceae.Escherichia/Shigella	0.0801372	0.152071
Erysipelotrichaceae.Catenibacterium	-0.00943047	-0.21094
Veillonellaceae.Dialister	-0.0189976	-0.201239
Staphylococcaceae.Staphylococcus	-0.0917735	-0.308245
Coriobacteriaceae.Eggerthella	-0.103879	0.459395
Erysipelotrichaceae.Holdemania	-0.258516	0.0246901
Lactobacillaceae.Lactobacillus	-0.274502	0.0195763
Ruminococcaceae.Subdoligranulum	-0.389326	-0.0249807
Coriobacteriaceae.Gordonibacter	-0.457679	0.0168471
Ruminococcaceae.Ruminococcus	-0.481895	-0.0488087
